# Title; Synchronous chromosome segregation in mouse oocytes is ensured by biphasic securin destruction and cyclin B1-Cdk1

Authors; Christopher Thomas<sup>1, 2\*</sup>, Mark D. Levasseur<sup>1</sup>, Rebecca J. Harris<sup>1</sup>, Owen R. Davies<sup>1</sup>, Suzanne Madgwick<sup>1\*</sup>

<sup>1</sup>Cell Division Biology Group, Institute for Cell and Molecular Biosciences, Faculty of Medical Sciences, Newcastle University, NE2 4HH, UK.

<sup>2</sup>Present address: Max Planck Institute for Biophysical Chemistry, Am Fassberg 11, 37077 Gottingen, Germany.

\*Corresponding authors; [christopher.thomas@mpibpc.mpg.de](mailto:christopher.thomas@mpibpc.mpg.de), [suzanne.madgwick@newcastle.ac.uk](mailto:suzanne.madgwick@newcastle.ac.uk)

**Abstract** Successful cell division relies on the faithful segregation of chromosomes. If chromosomes segregate prematurely the cell is at risk of aneuploidy. Alternatively, if cell division is attempted in the absence of complete chromosome segregation, non-segregated chromosomes can become trapped within the cleavage furrow and the cell can lose viability. Securin plays a key role in this process, acting as a pseudosubstrate to inhibit the protease separase that functions to cleave the cohesin rings that hold chromosomes together. Consequently, securin must be depleted ahead of anaphase, ensuring chromosome segregation occurs in time with the anaphase trigger. Here we find that MI mouse oocytes contain a large excess of securin over separase and reveal the existence of a novel mechanism that functions to promote the destruction of excess securin in prometaphase. Critically, this mechanism relies on key residues that are only exposed when securin is not bound to separase. We suggest that the majority of non-separase bound securin is removed by this mechanism, allowing for separase activity to be protected until just before anaphase. In addition, we further demonstrate the importance of complementary mechanisms of separase inhibition by directly measuring cleavage activity in live oocytes, confirming that both securin and inhibition by cyclin B1-Cdk1 are independently sufficient to prevent premature separase activation.

## 35     **Introduction**

36     Successful cell division depends on the precise segregation of chromosomes into two  
 37     equal sets. In mitosis and meiosis II this involves the segregation of sister chromatids.  
 38     In meiosis I, pairs of homologous chromosomes are segregated in a reductional  
 39     division that introduces genetic diversity. If chromosomes missegregate during these  
 40     divisions, cells are at risk of aneuploidy, a hallmark of cancer and the primary genetic  
 41     cause of miscarriage and developmental defects in babies<sup>1-5</sup>.

42     Through all cell divisions, the protease separase plays an essential role, cleaving the  
 43     cohesin complexes that hold both sister chromatids and homologous chromosome  
 44     pairs together<sup>6,7</sup>. It is therefore critical that separase remains inactive until all  
 45     chromosomes are correctly aligned and the cell is prepared for anaphase.

46     Not surprisingly, separase activity is tightly regulated through the cell cycle. This  
 47     regulation is executed through two distinct inhibitory pathways. In the primary  
 48     pathway, separase directly interacts with securin, which acts as a pseudosubstrate  
 49     inhibitor for separase<sup>8</sup>. In addition to this, upon phosphorylation by Cdk1, separase is  
 50     inhibited by binding Cdk1's activating partner cyclin B1<sup>9-12</sup>. The binding of separase  
 51     with either securin or cyclin B1 is mutually exclusive and the relative contribution of  
 52     each pathway varies depending on cell type and developmental state<sup>10,12</sup>. In female  
 53     mouse meiosis II and eukaryotic mitosis, securin is largely responsible for separase  
 54     inhibition, while primordial germ cells and early stage embryos rely primarily on  
 55     cyclin B1-Cdk1-mediated separase inhibition<sup>13-15</sup>. Interestingly however, while  
 56     securin binding to separase is the primary inhibitory mechanism in mitotic cells, it is  
 57     also dispensable, demonstrating the compensatory nature of these two pathways<sup>16-18</sup>.  
 58     Similarly, in fixed MI mouse oocytes Chiang et al. were able to inhibit securin or  
 59     cyclin B1-Cdk1 mediated separase inhibition individually without observing  
 60     segregation defects. Chromosome segregation errors were only detected when both  
 61     inhibitory pathways were removed<sup>19</sup>.

62     Importantly, securin and cyclin B1 are not only involved in separase inhibition but  
 63     their binding also plays a key role in priming separase for activation<sup>20-22</sup>.  
 64     Furthermore, the degradation of securin and cyclin B1 must be coupled in order to  
 65     ensure that separase activation and the poleward movement of chromosomes are

66 timed correctly. In situations where these events become disconnected, anaphase is  
67 defective<sup>23–25</sup>.

68 In mitosis, the synchronous loss of cyclin B1 and securin is ensured by the similarity  
69 of their destruction mechanisms. Both are ubiquitinated by the Anaphase Promoting  
70 Complex/Cyclosome (APC/C) in metaphase<sup>26,27</sup>. Critically, this ubiquitination relies  
71 on both the availability of the APC/C activator protein Cdc20 and on a short linear  
72 motif known as the D-box present in the N-terminus of both securin and cyclin B1<sup>28–</sup>  
73 <sup>30</sup>. Once all chromosomes are properly attached to spindle microtubules in metaphase,  
74 Cdc20 and the APC/C form a bipartite receptor for D-box docking, triggering securin  
75 and cyclin B1 destruction by the proteasome<sup>31,32</sup>. Prior to this, Cdc20 is sequestered  
76 by the spindle assembly checkpoint (SAC), a diffusible signal generated at each  
77 unattached kinetochore. The SAC functions to prevent docking of D-box motifs to the  
78 APC/C and thereby inhibit anaphase until all chromosomes are attached to spindle  
79 microtubules<sup>33,34</sup>.

80 In contrast, securin and cyclin B1 destruction in mouse oocyte meiosis I is initiated in  
81 prometaphase, prior to full chromosome alignment<sup>35,36</sup>. Initially this might seem like a  
82 failure to ensure accurate chromosome segregation. However, our recent work  
83 demonstrates that degradation of cyclin B1 in prometaphase is in fact a key feature of  
84 a mechanism that functions to prevent aneuploidy in mouse oocytes<sup>36</sup>. At this time  
85 point, destruction represents only the loss of non-Cdk1-bound cyclin B1. Here, cyclin  
86 B1 is targeted by an additional motif to the D-box, the PM motif. Importantly, the PM  
87 motif is only accessible in cyclin B1 that is not bound to Cdk1. By this strategy, an  
88 excess of cyclin B1 acts as an APC/C decoy to maintain Cdk1 activity and prolong  
89 prometaphase in oocyte meiosis I. This is critical in mouse oocytes since, in the  
90 absence of excess cyclin B1, spindle checkpoint activity is insufficient in preventing  
91 anaphase for long enough to fully align chromosomes, a process that takes hours  
92 rather than the tens of minutes to complete mitosis<sup>36</sup>.

93 Our discovery of a novel pathway of meiotic cyclin B1 regulation raises significant  
94 questions with regard to securin regulation. Since the D-box is insufficient for the  
95 correct degradation timing of cyclin B1 in oocytes, it seemed highly likely that  
96 additional pathways exist to degrade securin.

97 Here we find that securin exists in large excess to separase in oocyte MI. We identify  
98 key residues that function to promote the degradation of non-separase bound securin  
99 in prometaphase. Beyond this we show the importance of complementary  
100 mechanisms of separase inhibition in live oocytes.

101

## 102 **Results**

### 103 **Securin destruction begins 2.5 hours ahead of separase activation in meiosis I in** 104 **mouse oocytes.**

105 In mitosis, securin is destroyed alongside cyclin B1 and only in metaphase once the  
106 spindle checkpoint signals that all kinetochores are correctly attached to  
107 microtubules<sup>26,27</sup>. In contrast, while securin and cyclin B1 are also targeted  
108 simultaneously in meiosis I of mouse oocytes, their destruction is initiated much  
109 earlier, ahead of chromosome alignment and spindle migration in prometaphase (Fig.  
110 1a). However, as division errors are rare in mouse oocytes, it seemed unlikely that this  
111 early targeting of securin affects separase activity so far ahead of anaphase.

112 To assess whether degradation of securin and cyclin B1 in prometaphase caused  
113 separase activation, we used a separase activity biosensor generated by Nam et al. that  
114 has previously been validated in oocytes<sup>37-39</sup>. The sensor consists of nucleosome-  
115 targeted H2B protein fused to eGFP and mCherry fluorophores. Between the two  
116 fluorophores, an Scc1 peptide sequence is cleaved by active separase. Scc1 cleavage  
117 results in a yellow to red colour shift as the eGFP signal dissociates into the  
118 cytoplasm and mCherry remains bound to histones associated with chromosomal  
119 DNA. We injected germinal vesicle (GV) stage oocytes with mRNA encoding the  
120 biosensor and imaged the live cells through MI. A clear shift in colour was  
121 consistently observed just 20-30 minutes ahead of polar body extrusion (Fig. 1c). This  
122 timing was confirmed by the quantification of the eGFP/mCherry fluorescence ratio  
123 (Fig. 1a). The data indicate that separase is only active from 30 minutes ahead of  
124 polar body extrusion, with the majority of substrate cleavage taking place in the final  
125 20 minutes. Importantly, separase becomes active more than 2 hours after the  
126 initiation of securin destruction.

### 127 **The D-box is insufficient for wild-type securin destruction in MI**

128 In mouse oocytes, cyclin B1 is destroyed by a two-step mechanism; an initial period  
129 of prometaphase destruction requires both a D-box and an additional motif (the PM  
130 motif). This is followed by a second period of destruction as the D-box becomes  
131 sufficient once the SAC is satisfied in metaphase<sup>36</sup>. Given that securin and cyclin B1  
132 destruction is synchronous in oocytes, we reasoned that securin may also be destroyed  
133 by a similar mechanism<sup>35,36</sup>. To test this, we initially designed and tested two  
134 fluorescent reporters; full-length securin (securin FL) and the N-terminal 101 residues  
135 (securin N101). Both securin reporters and all that follow were coupled to VFP to  
136 give a direct readout of exogenous protein level in the oocyte. Critically both  
137 constructs contain the D-box and all neighbouring lysine residues necessary for  
138 APC/C recognition and subsequent proteolysis (Fig. 2a).

139 Strikingly, we found that securin FL was consistently targeted for destruction earlier  
140 than securin N101 (~80 minutes; Fig. 2b). Furthermore, when we compared the data  
141 generated in our cyclin B1 study, we found that securin N101 destruction was  
142 restricted to metaphase in time with the cyclin B1 mutant lacking the PM motif. This  
143 observation raised the possibility that, similar to cyclin B1 and other prometaphase  
144 APC/C substrates, an additional region is necessary to act alongside the D-box and  
145 direct wild-type securin degradation in prometaphase I in oocytes.

#### 146 **A discrete region within the C-terminus of securin promotes destruction in** 147 **prometaphase.**

148 To test if a second destruction motif exists within securin to facilitate prometaphase  
149 destruction, we replaced a highly conserved C-terminal region located between  
150 residues 109-133 (Fig. 2c) with a neutral 25 amino acid TGSGP repeat linker in the  
151 full-length securin construct (securin 109-133 mutant). This construct was targeted for  
152 destruction in time with securin N101 (Fig. 2d), ~80 minutes after securin FL. This  
153 indicated that residues between 109-133 are essential for prometaphase securin  
154 destruction in oocyte MI.

155 Following this finding, we divided residues 109-133 into three groups based on  
156 sequence conservation, mutating each group to assess their importance in the timing  
157 of securin degradation (Supplementary fig. 1a). Based on sequence similarity with the  
158 PM motif in cyclin B1, which centres on residues <sup>170</sup>DIY<sup>172</sup> in the mouse ortholog, we  
159 predicted that the first mutant, securin DAYPEIE-A, would eliminate prometaphase

targeting. Surprisingly however, securin DAYPEIE-A was instead targeted in time with securin FL (Supplementary fig.1b). In contrast, both FFPFNP-A and DFESFD-A mutations resulted in dramatic shifts in destruction timing (Supplementary fig.1c-d). Securin FFPFNP-A was targeted for destruction approximately 60 minutes after securin FL but still ~20 minutes ahead of securin N101 (Supplementary fig.1c), while securin DFESFD-A destruction mirrored that of securin N101 (Supplementary fig. 1d). This suggests that residues essential for wild-type prometaphase securin degradation lie within both of these regions. Since securin DFESFD-A showed the most striking phenotype, we mutated a pair of highly conserved phenylalanines (F125 and F128) to alanines (securin FxxF-A; Fig. 2e). Here, degradation was delayed by 90 minutes, mimicking securin N101 (Fig. 2f; see supplementary fig. 1e for destruction timings of all mutants). Importantly, mutation of residues F125 and F128 to alanines did not impair securin binding to separase as shown by peptide pull-down (Supplementary fig. 1f). We suggest that these two phenylalanine residues are a crucial component of a novel interaction that mediates the timing of securin loss by permitting prometaphase destruction in MI oocytes. In the absence of this interaction, securin destruction initiates 90 minutes later and only in metaphase. Interestingly, these two residues and their surrounding region have no sequence similarity with the PM motif present in cyclin B1.

To confirm that the difference in degradation timing between securin FL and securin FxxF-A was not simply due to differences in protein expression, oocytes were treated with cycloheximide (CHX) to block protein synthesis (Supplementary fig. 2). Upon addition of CHX, the securin FL protein turnover was evident. Approximately 20% of the total protein was lost before a steep period of destruction began 4 hours after CHX addition. In contrast, securin FxxF-A levels were relatively stable until destruction began ~5.5 hours after CHX addition. Critically, securin FxxF-A destruction begins around 90 minutes after securin FL, consistent with results from non CHX-treated oocytes.

Securin FL destruction in MI mouse oocytes begins in prometaphase at a time when Mad2 staining is still detectable at kinetochores<sup>40</sup>. This suggests that the SAC might have less influence over securin FL than securin FxxF-A. To assess this, we treated oocytes with 150 nM nocodazole. This dose of nocodazole depolymerises microtubules and activates the SAC such that PB1 extrusion is blocked in >98% of

oocytes. Under these conditions, the rate of securin FL degradation was dramatically reduced, though it was still almost fully degraded within a 10-hour period. In contrast, securin FxxF-A was almost completely stabilised (Fig. 2g). Together our data suggest that an interaction involving two key phenylalanine residues within securin is able to bypass a SAC signal capable of blocking destruction of substrates where only the D-box is accessible. The D-box is however essential for both phases of securin destruction, since mutation of the D-box perturbs both metaphase and prometaphase securin destruction, and inhibits PB1 extrusion (Supplementary fig. 3c).

Our data are consistent with a biphasic securin destruction process in MI oocytes. A first period of destruction 3 hours ahead of PB1 extrusion which requires both the D-box and an additional region with an absolute requirement for residues F125 and F128. This is followed by a second period of destruction in metaphase as the D-box becomes sufficient for degradation 1 hour ahead of PB1 extrusion. Critically, our separase biosensor data indicates that separase is only active during the latter half of the second phase of securin destruction.

# **Two phenylalanine residues key to prometaphase securin destruction are predicted to be masked when securin is bound to separase.**

Interestingly, F125 and F128 are positioned within securin's separase interaction segment, in the vicinity of the residues involved in securin's pseudosubstrate binding to the separase active site<sup>41,42</sup>. We therefore asked how these phenylalanine residues are positioned when securin is in complex with separase. Since a mammalian crystal structure for the securin-separase complex is yet to be solved, we instead used the existing structure of the *S. cerevisiae* complex as a reference<sup>41</sup>. Critically, these residues and the surrounding region are largely conserved between mammals and yeast (Fig. 3a). In the structure, residues Y276 and F279, corresponding to F125 and F128 in the human protein, sit deep within a hydrophobic binding pocket on the surface of separase (Fig. 3b). It is therefore highly likely that these two residues would be obscured when securin is in complex with separase. The conservation of these residues throughout eukaryotes (Fig. 3a), coupled with their neighbouring position to the pseudosubstrate region of securin, lead us to propose that these residues would be similarly hidden in other species.

# **Securin is present in large excess over separase in mouse oocytes.**



225 Given that F125 and F128 are predicted to be masked when securin is bound to  
 226 separase, we speculated that destruction in prometaphase must represent that of a non-  
 227 separase bound population of securin. In mitosis, securin protein is in excess of  
 228 separase<sup>43,44</sup>. This ratio has been quantified in HeLa cells, where free securin is  
 229 reported to be 4-5 fold more abundant than separase-associated securin<sup>43</sup>. Therefore  
 230 we considered that a similar excess of securin in oocytes could provide the basis for a  
 231 mechanism able to support an extended period of securin destruction without a release  
 232 of separase inhibition. To address this, we compared the separase to securin ratio in  
 233 mitosis with that in MI oocytes by western blotting. We find that securin is present at  
 234 comparable levels between 96 oocytes and HeLa cell extracts prepared from 2500 and  
 235 5000 cells (Fig. 3ci). Yet while separase was readily detectable in the mitotic extracts,  
 236 no band was observed in the 96 oocyte lane (Fig. 3cii). By extending the exposure  
 237 time from 30 seconds to 10 minutes, a small separase band was detected in the 96  
 238 oocyte lane, where all mitotic lanes became strongly overexposed (Fig. 3ciii). We  
 239 conclude that in oocytes, securin is present in much greater excess to separase than  
 240 the 4-5 fold difference documented in HeLa cells.

241 We therefore suggest a mechanism by which a large pool of excess non-separase  
 242 bound securin is preferentially targeted for destruction in late prometaphase by a  
 243 mechanism involving both the D-box and a second region where F125 and F128 are  
 244 essential. Following this, a smaller pool of separase-bound securin becomes a  
 245 destruction target in metaphase.

246 Preferential destruction of non-separase bound securin has previously been  
 247 demonstrated in HeLa cells. Hellmuth et al. showed that separase-bound securin is  
 248 dephosphorylated by PP2A-B56 phosphatase, whereas free securin exists in a  
 249 phosphorylated state and is a preferential APC/C target<sup>43</sup>. Importantly however, the  
 250 destruction of both separase-bound and non-separase bound securin in mitosis takes  
 251 place only after SAC satisfaction. It therefore seems unlikely that this same  
 252 mechanism is responsible for degradation of non-separase bound securin in  
 253 prometaphase in mouse oocytes. To confirm this, we mutated four key  
 254 phosphorylation sites in securin to alanines (securin 4A; S31A, T66A, S87A and  
 255 S89A) and observed no change in destruction timing compared to securin FL  
 256 (Supplementary fig. 4). We therefore suggest that the mechanism of non-separase



bound securin degradation described in this manuscript occurs independently of phosphorylation status.

## **Two complimentary mechanisms prevent premature separase activation and division errors**

We next wanted to investigate how separase activity is affected in meiosis when the large excess of securin is removed. Chiang et al. previously showed that segregation errors in fixed oocytes were only observed when both securin and cyclin B1-Cdk1-mediated separase inhibition were removed<sup>19</sup>. However, when these errors arise and how separase is regulated through time remains unclear. To investigate this, we knocked down securin protein expression with a morpholino oligo (MO) such that in prometaphase, MO oocytes contained ~13% of the protein level relative to non-treated control cells (quantified by western blot; Supplementary fig. 5). Despite severe depletion of securin, the cleavage activity of separase was still restricted to the final 30 minutes preceding PB1 extrusion (Fig 4a). This result agrees with observations made in fixed oocytes, suggesting that cyclin B1-Cdk1 levels are sufficient to compensate for the loss of securin. To test whether this was also the case in our live cell assay, we injected oocytes with a previously published separase AA mutant<sup>19</sup>. This construct is fully active but lacks Cdk1 phosphorylation sites (S1121A and T1342A) that prevent its inhibition by cyclin B1-Cdk1. Importantly, oocytes expressing separase AA protein produce separase activity profiles identical to control oocytes, suggesting that securin was similarly sufficient to compensate for a loss of cyclin B1-Cdk1-mediated inhibition (Fig. 4a). In contrast, where securin protein levels are restricted in separase AA expressing oocytes (separase AA + securin MO), cleavage activity initiates up to 1 hour ahead of polar body extrusion (Fig. 4a). Furthermore, by the time they extruded a polar body, separase AA + securin MO-injected oocytes had cleaved roughly twice as much sensor compared to control cells (Fig. 4a).

To monitor the impact of premature separase activity in separase AA + securin MO oocytes, we used confocal microscopy to image live oocytes stained with SiR-DNA to track individual chromosome movements<sup>45</sup>. This analysis revealed premature chromosome segregation from 40 minutes ahead of polar body extrusion in separase AA + securin MO oocytes resulting in a non-synchronous anaphase and an increased

289 occurrence of lagging chromosomes (Fig 4bi + supplementary videos 1-4).  
 290 Furthermore, in 13% of separase AA + securin MO oocytes, the segregation errors  
 291 were so severe that anaphase failed completely (supplementary videos 5 and 6). This  
 292 is in stark contrast to the tightly synchronised anaphase observed in untreated control  
 293 oocytes ~20 minutes ahead of polar body extrusion (Fig 4bii + supplementary videos  
 294 7-9). Quantification of the number of chromosomes segregated in each 10-minute  
 295 time interval prior to anaphase (where anaphase was defined as the time point at  
 296 which more than 50% of chromosomes had segregated) revealed that the premature  
 297 separation of bivalents only took place in separase AA expressing oocytes where  
 298 securin levels were restricted. In either separase AA only, or securin MO only  
 299 treatment groups, almost all oocytes segregated their chromosomes synchronously  
 300 within a single 10-minute time interval (Fig 4c).

301 These data further demonstrate that either inhibitory pathway, an excess of securin or  
 302 inhibition by cyclin B1-Cdk1, is sufficient to prevent premature separase activity in  
 303 mouse oocytes. When both pathways are diminished, the timing of anaphase and the  
 304 timing of separase release are uncoupled. This results in severe chromosome  
 305 segregation defects. Interestingly, even when both a securin excess is depleted and  
 306 cyclin B1-Cdk1-mediated inhibition is prevented, separase activity still remains  
 307 suppressed until the final hour of meiosis. This suggests that even severely restricted  
 308 securin levels are sufficient for separase inhibition during the hours leading up to  
 309 metaphase in meiosis.

310

## 311 **Discussion**

312 Similar to sister chromatid segregation in mitosis, the segregation of homologous  
 313 chromosome pairs in mouse oocyte meiosis I requires the proteolysis of both securin  
 314 and cyclin B1<sup>23</sup>. Importantly, in both somatic and germ cells, the degradation of  
 315 securin and cyclin B1 is synchronous and both proteins must be depleted in order for  
 316 separase activation and Cdk1 inactivation to be temporally coupled<sup>23-25</sup>. In mouse  
 317 meiosis I, a premature loss of Cdk1 activity ahead of securin degradation drives polar  
 318 body extrusion, yet chromosomes do not segregate and instead become trapped within  
 319 the cleavage furrow<sup>46</sup>.

320 Here we show that mouse oocytes in meiosis I contain a large excess of securin over  
 321 separase (several fold beyond that reported in mitosis). We reveal the existence of a  
 322 novel mechanism of targeted degradation that functions to promote the destruction of  
 323 non-separase bound securin in prometaphase. Critically this mechanism relies on a  
 324 key region of securin which is only exposed when securin is not bound to separase.  
 325 We suggest that in oocytes, the majority of non-separase-bound securin is removed by  
 326 this mechanism, while a much smaller fraction of inhibitory separase-bound securin is  
 327 only targeted in metaphase. By this strategy, the cellular destruction machinery is far  
 328 less likely to be overwhelmed by excessive securin molecules during the final stages  
 329 of chromosome segregation. This is particularly important given that separase must be  
 330 rapidly released simultaneously on all chromosomes, ensuring their synchronous  
 331 segregation. Indeed, our recent data demonstrates a similar strategy for the removal of  
 332 non-Cdk1-bound cyclin B1 ahead of cyclin B1-Cdk1 activity; essential to permit a  
 333 rapid drop in Cdk1 activity and to prevent anaphase from stalling<sup>36</sup>.

334 We show that securin destruction is biphasic in MI oocytes, consisting of a metaphase  
 335 period of D-box only destruction (resembling mitotic destruction), and a  
 336 prometaphase period of destruction requiring both the D-box and an additional region  
 337 able to bypass spindle checkpoint inhibition. How this additional region functions to  
 338 bypass the spindle checkpoint remains unclear. However we suggest that, similar to  
 339 other prometaphase APC/C substrates, this region of securin could be involved in  
 340 either direct binding to the APC/C or in outcompeting spindle assembly checkpoint  
 341 protein inhibition of APC/C-Cdc20<sup>47-50</sup>. In addition, cyclin B3 has recently been  
 342 shown to have an important role in mouse oocyte MI in priming the APC/C for  
 343 securin and cyclin B1 destruction<sup>39,51,52</sup>. Therefore an alternative possibility is that  
 344 this region in securin is regulated by cyclin B3 and involved in an oocyte-specific  
 345 APC/C activation mechanism. It is worth noting that the regions we describe in  
 346 securin and cyclin B1 do not share sequence similarity. It is therefore possible that  
 347 while their destruction timings are coupled, the mechanisms by which they are  
 348 targeted early in prometaphase may be distinct.

349 Chiang et al. report in fixed oocytes that either securin or cyclin B1-Cdk1 inhibitory  
 350 pathways are sufficient to independently prevent chromosome segregation errors in  
 351 young mouse oocytes<sup>19</sup>. Our results in live oocytes agree with this, and further  
 352 demonstrate that separase activity is only released prematurely when both inhibitory

pathways are perturbed. It remains to be determined whether the excess of non-separase-bound securin becomes essential in aged mouse oocytes (where cohesin levels are significantly reduced<sup>53,54</sup>), and over the prolonged duration of prometaphase in human oocytes (14 – 18 hours compared to 4.5 - 6.5 hours in mouse<sup>55,56</sup>). Furthermore, it seems likely that an excess of securin in MI, could function to ensure a threshold level of securin protein in MII. MII securin protein level is particularly important since unlike MI, cyclin B1-Cdk1 is no longer able to compensate for depleted securin in this division<sup>13,19</sup>. Indeed Nabti et al. revealed that oocytes from aged mice destroy securin more rapidly and to a greater extent than oocytes from younger mice. As a consequence, separase inhibition in MII is incomplete in these cells and sister chromatid cohesion is lost prematurely resulting in segregation defects<sup>57</sup>.

Destruction of securin during prometaphase has previously been considered as precocious, an error resulting from a weakened SAC in oocytes<sup>58</sup>. Our work instead demonstrates that this period of destruction is deliberate. In prometaphase, an excess of non-separase bound securin is targeted for destruction through a novel mechanism in oocytes. By this strategy, separase bound securin is protected, allowing for a switch-like activation of separase, essential for the fidelity of anaphase in oocytes.

## Main Figure Legends

**Figure 1. Securin destruction begins 2.5 hours ahead of separase activation in mouse oocyte meiosis I.** (A) Graph showing the mean destruction profiles of VFP-tagged securin FL (magenta trace, n = 25) and cyclin B1 FL (blue trace, n = 62) alongside separase activity as determined by a separase activity biosensor (eGFP/RFP ratio, n = 20) in MI mouse oocytes relative to PB1 extrusion. Error bars ± SEM. Representative confocal images show a maturing oocyte expressing Map7-GFP (microtubules in green) and incubated with SiR-DNA (DNA in red) at times relative to the x-axis of the graph. Scale bar = 10 μm. (B) Schematic diagram of an H2B-mCherry-Scc1-eGFP separase activity biosensor. (C) Representative time-lapse images of an oocyte expressing the separase activity biosensor in Fig. 1B, imaged every 10 minutes at the times indicated relative to PB1 extrusion. eGFP (green), mCherry (red) and merged fluorescence + bright field (BF) images are shown. Scale

385 bar = 10 $\mu$ m. eGFP and mCherry images correspond to the areas marked by the white  
386 dotted lines in the merge + BF images.

387 **Figure 2. A discrete region within the C-terminus of securin promotes**  
388 **destruction in prometaphase.** (A) Schematic showing VFP-tagged securin and  
389 cyclin B1 truncations and mutations. (B) Average securin FL (magenta trace, n = 25),  
390 securin N101 (pink dashed trace, n = 23), cyclin B1 FL (blue trace, n = 32) and cyclin  
391 B1 PM mutant (light blue dashed trace, n=34) destruction profiles relative to PB1  
392 extrusion. (C) Sequence alignment of residues 109-133 in securin orthologs. (D)  
393 Average VFP-tagged securin FL (magenta trace, n = 25), securin N101 (pink dashed  
394 trace, n = 23) and securin 109-133 mutant (light blue trace, n = 23) destruction  
395 profiles relative to PB1 extrusion. (E) Schematic showing the position of Securin  
396 FxxF-A amino acid substitutions. Residues F125 and F128 (shown in green in the  
397 wild type protein) were switched to alanines (shown in red in Securin FxxF-A). (F)  
398 Average VFP-tagged securin FL (magenta trace, n = 25), securin N101 (pink dashed  
399 trace, n = 23) and securin FxxF-A (green trace, n = 20) destruction traces relative to  
400 PB1 extrusion. (G) VFP-tagged securin FL (magenta traces, n = 20) and securin  
401 FxxF-A (green traces, n = 30) destruction profiles following incubation in 150 nM  
402 nocodazole to arrest oocytes in prometaphase. These oocytes do not extrude a polar  
403 body and are therefore aligned at GVBD. Error bars  $\pm$  SEM.

404 **Figure 3. F125 and F128 are predicted to direct the prometaphase destruction of**  
405 **a pool of non-separase-bound excess securin.** (A) Alignment of the region  
406 surrounding residues F125 and F128 in securin orthologs. (B) The molecular surface  
407 of separase (green) in contact with the region of securin detailed in Fig. 3a (purple).  
408 Image generated using the crystal structure of the *Saccharomyces cerevisiae* separase-  
409 securin complex. The side chains of securin residues Y276 and F279, which  
410 correspond to F125 and F128 in the human protein, are shown as stick models and  
411 labelled in purple. The N- and C-termini of the securin segment displayed are also  
412 labelled in purple (C) Western blot analysis of lysates prepared from mitotic cells in  
413 late prometaphase (U2OS and HeLa cells), and mouse oocytes in late prometaphase  
414 (collected at 5.5 hours post GVBD). The numbers of mitotic cells and oocytes loaded  
415 into each lane are as indicated. Membranes were used to detect (i) securin, (ii)  
416 separase by a short exposure and (iii) separase by a long exposure (iii).

**Figure 4. Both a securin excess and cyclin B1-Cdk1-mediated inhibition are independently sufficient to suppress separase activity and prevent segregation errors in mouse oocyte meiosis I.** (A) Graph showing mean MI separase activity profiles as determined by a separase activity biosensor (eGFP/RFP ratio) for control (purple trace, n = 8), separase AA-injected (a fully active separase construct lacking Cdk1 phosphorylation sites S1121A and T1342A; orange trace, n = 7), securin MO-injected (blue trace, n = 8) and separase AA + securin MO-injected (green trace, n = 10) mouse oocytes relative to PB1 extrusion. Error bars  $\pm$  SEM. (B) Representative images showing chromosome segregation in the 40 minutes prior to PB1 extrusion in (i) securin MO + separase AA-injected and, (ii) control oocytes. Chromosomes were visualised by incubating oocytes with SiR-DNA (shown in magenta and merged with bright field) at times shown relative to PB1 extrusion. Scale bar = 10 $\mu$ m. SiR-DNA images correspond to the areas marked by the white dotted lines in the merged images. (C) Graph showing the mean number of chromosomes segregated per 10 minute time point in the 40 minutes prior to anaphase (defined as the time point in which more than 50% of chromosomes had segregated) for control (purple trace, n = 8), separase AA-injected (orange trace, n = 7), securin MO-injected (blue trace, n = 8) and separase AA + securin MO-injected (green trace, n = 10). Error bars  $\pm$  SEM.

435

## 436 **Supplementary Figure Legends**

**Supplementary figure 1. Destruction profiles of securin mutation constructs leading to identification of the F125 and F128 as essential for prometaphase securin destruction.** (A) Securin residues 109-133 showing sequence detail relative to the nomenclature of all venus-tagged securin mutations assayed in parts B-D. (B) Average VFP-tagged securin FL (magenta trace, n = 25), securin N101 (dashed pink trace, n = 23) and securin DAYPEIE-A (yellow trace, n = 19) destruction traces. (C) Average VFP tagged securin FL (magenta trace, n = 25), securin N101 (dashed pick trace, n = 23) and securin FFPFNP-A (purple trace, n = 23) destruction traces. (D) Average VFP-tagged securin FL (magenta trace, n = 25), securin N101 (dashed pick trace, n = 23) and securin DFESFD-A (green trace, n = 20) destruction traces. All traces are lined at PB1 extrusion and error bars =  $\pm$ SEM throughout. (E) Direct comparison of the timing of destruction of all Venus-tagged securin truncations and



mutants plotted in parts B-D. Schematic representations of securin constructs are shown down the right hand side. To the left, the length of each bar indicates each construct's destruction timing relative to complete destruction (time 0; approximately 0-10 mins post PB1 extrusion). The open, white bars indicate the point at which 75% of the destruction has taken place. The light red extension to this bar indicates the point at which 50% of the destruction has taken place, followed by a dark red extension indicating the point at which 25% of the destruction has taken place. The period over which PB1 extrusions occur is shaded in grey. (F) HeLa cells transfected with securin FL, securin FxxF-A or empty mVenus N1 transfection vector as indicated were synchronised in nocodazole for 16 hours and collected by mitotic shake off. Cells were then lysed and anti-GFP immunoprecipitates (IP) were probed for separase. Input signals are also shown.

**Supplementary figure 2. Differences in the timing of securin FL and FxxF-A destruction are not due to a difference in protein expression rate.** Average VFP-tagged securin FL (magenta traces, n = 24) and securin FxxF-A (green traces, n = 27) on addition of cycloheximide to inhibit protein synthesis. Traces are aligned to the addition of cycloheximide at 3 hours post GVBD. Fine traces represent destruction profiles from individual oocytes; heavy traces represent the average destruction profile resulting from all injected oocytes of a given construct.

**Supplementary figure 3. Meiotic securin destruction is D-box dependent but not KEN box dependent.** (A) Alignment of residues 1-69 in securin orthologs containing both KEN box and D-box motifs as indicated. (B) Average VFP-tagged securin FL (magenta traces, n = 25) and securin KEN mutant (purple traces, n = 20) destruction profiles aligned at PB1 extrusion. (C) Average VFP-tagged securin FL (magenta traces, n = 16) and securin D-box mutant (light blue traces, n = 23) destruction profiles aligned at GVBD (oocytes expressing D-box mutant securin arrest their cell cycle in metaphase do not extrude a polar body). (D) Average VFP-tagged securin FL (magenta traces, n = 16) and securin KEN/D-box mutant (red traces, n = 19) destruction profiles aligned at GVBD. Note that though neither securin D-box mutant nor securin KEN/D-box mutant expressing oocytes extrude a polar body, securin destruction is only completely inhibited where both the D- and the KEN-box are



absent. Fine traces represent individual oocyte fluorescence levels and heavy traces represent their average throughout.

#### **Supplementary figure 4. A securin phosphomutant does not affect degradation**

**timing in meiosis I mouse oocytes.** (A) Average VFP-tagged securin FL (magenta trace, n=25) and securin 4A (blue trace, n=17; securin 4A is a phosphomutant containing mutations S31A, T66A, S87A and S89A<sup>43</sup>) destruction profiles aligned at PB1 extrusion. Error bars = +/- SEM.

#### **Supplementary figure 5. Quantification of securin morpholino knock down.**

Western blot of control and securin morpholino (MO) injected oocytes collected 5.5 hours post GVBD (numbers of oocytes loaded per lane are indicated). Quantification of protein bands indicates an 87% knockdown of securin in MO-injected oocytes. The lower blot was probed for vinculin and used as a loading control.

## **Methods**

### **Contact for Reagent and Resource Sharing**

Further information and requests for resources and reagents should be directed to Suzanne Madgwick ([suzanne.madgwick@newcastle.ac.uk](mailto:suzanne.madgwick@newcastle.ac.uk)).

### **Gamete Collection and Culture**

4 to 8-week-old female, outbred, CD1 mice (Charles River) were used. All animals were handled in accordance with ethics approved by the UK Home Office Animals Scientific Procedures Act 1986. GV stage oocytes were collected from ovaries punctured with a sterile needle and stripped of their cumulus cells mechanically using a pipette. For bench handling, microinjections and imaging experiments, oocytes were cultured at 37°C in medium M2 (Sigma) supplemented where necessary with the addition of 30 nM 3-isobutyl-1-methylxanthine (IBMX; Sigma) to arrest oocytes at prophase I. Data was only collected from oocytes that underwent GVBD with normal timings and had a diameter within 95-105% of the population average. To ensure reproducibility, oocyte data sets were gathered from a minimum of 3 independent experiments. For each independent experiment, both control and

513 treatments groups were derived from the same pool of oocytes, collected from a  
514 minimum of 2 animals. Oocytes were selected at random for microinjection. Where  
515 necessary, and at the times indicated, nocodazole (Sigma) was added to the media at a  
516 final concentration of 150 nM. For confocal imaging SiR Hoechst was added to media  
517 30 minutes prior to imaging at a final concentration of 250 nM<sup>45</sup>.

## 518 **Preparation of cRNA constructs for microinjection**

519 Microtubule associated protein 7 (Map7; to visualise microtubules<sup>59</sup>), wild type  
520 human securin, securin truncations, separase biosensor (a gift from Jan Van Deursen)  
521 and separase AA mutant (a gift from Michael Lampson) sequences were amplified by  
522 PCR as previously described<sup>60</sup>. Mutations within securin were generated by primer  
523 overhang extension PCR. Following this we performed Sequence and Ligation  
524 Independent Cloning (SLIC)<sup>61</sup> using modified pRN3 vectors to generate either a  
525 construct with no further tags (the separase biosensor) or constructs coupled to a  
526 Venus fluorescent protein (all other sequences)<sup>62</sup>. Resultant plasmids were linearized  
527 and cRNA for microinjection was prepared using a T3 mMESSAGE mMACHINE kit  
528 according to the manufactures instructions (Ambion Inc.). Maximal stability was  
529 conferred on all cRNA constructs by the presence of a 5' globin UTR upstream and  
530 both 3'UTR and poly (A)–encoding tracts downstream of the gene. cRNA was  
531 dissolved in nuclease-free water to the required micropipette concentration.

## 532 **Knockdown of gene expression using morpholinos**

533 A Morpholino antisense oligo designed to recognize the 5' UTR of securin (sequence:  
534 GATAAGAGTAGCCATTCTGGATTAC ; MO; Gene Tools) was used to  
535 knockdown gene expression. As per the manufacturer's instructions, the oligo was  
536 stored at room temperature, heated for 5 minutes at 65°C prior to use and loaded at a  
537 micropipette concentration of 1 mM.

## 538 **Microinjection and imaging**

539 Oocyte microinjection of the MO and construct mRNAs was carried out on the heated  
540 stage of an inverted microscope fitted for epifluorescence (Olympus; 1X71). In brief,  
541 fabricated micropipettes were inserted into cells using the negative capacitance  
542 overcompensation facility on an electrophysiological amplifier (World Precision  
543 Instruments). This procedure ensures a high rate of survival (>95%). The final volume

544 of injection was estimated by the diameter of displaced ooplasm and was typically  
545 between 0.1-0.3% of total volume.

546 To generate destruction profiles, bright field and fluorescence images were captured  
547 every 10 minutes throughout meiosis I by an inverted Olympus IX71 microscope  
548 (fitted for epifluorescence) and CCD camera (Micromax, Sony Interline chip,  
549 Princeton Instruments). Images were then analysed and processed using MetaFluor  
550 software (version 7.7.0.0; Molecular Devices). All experiments were performed at  
551 37°C.

552 Confocal images (including all experiments using the separase biosensor) were  
553 captured using a Zeiss LSM-800. Oocytes were imaged at 10 minute intervals though  
554 20+ Z-sections over a 12-hour period from GV stage. All experiments were  
555 performed in a temperature-controlled, humidified chamber set at 37°C. Bright-field  
556 and fluorescent images were recorded in Zen Blue (Zeiss) and processed in Fiji. By  
557 this method, all oocytes extruded polar bodies.

#### 558 **Molecular structure images and multiple sequence alignments**

559 Molecular structure images were generated using the PyMOL Molecular Graphics  
560 System, version 1.3 Schrödinger, LLC. Sequence conservation alignments were made  
561 by importing protein sequences from Uniprot and aligning in Jalview, version 15.0.  
562 All figures were prepared in Adobe Illustrator CC, version 17.1.0.

#### 563 **Mitotic Cell Cultures**

564 Standard laboratory U2OS and HeLa cell lines (a gift from Jonathan Higgins) were  
565 used to generate lysates for western blotting. Both cell types were cultured in flasks at  
566 37°C, 5% CO<sub>2</sub> in DMEM (Lonza) with 10% FBS (Life Technologies) and antibiotics.  
567 Once cell coverage reached ~90%, flasks were treated with 100 nM nocodazole for an  
568 8-hour incubation period for western blotting and a 16-hour incubation period for  
569 immunoprecipitation. Metaphase cells were then collected by mechanical shake off  
570 and lysed.

#### 571 **Immunoprecipitation**

572 HeLa cells transfected with securin FL, securin FxxF-A or empty mVenus N1  
573 transfection vector were synchronised and collected as described above. Cells were

574 then lysed in 50 mM Tris-HCl, pH 7.8, 150 mM NaCl, 0.5% NP-40 plus protease  
575 inhibitor cocktail (Roche) for 30 min on ice and clarified by a 12,000 g spin for 20  
576 min at 4°C. Complexes were immunoprecipitated for 90 minutes at 4°C with GFP-  
577 Trap beads (Chromotek). After five washes in lysis buffer, proteins were eluted from  
578 beads by incubating for 10 minutes at 95°C in sample buffer. The supernatant was  
579 then analysed by immunoblotting.

## 580 **Immunoblotting**

581 Mitotic U2OS and HeLa cell lysates were prepared using Laemmli buffer following  
582 mechanical shake off of metaphase cells. Oocytes were collected 5.5 hours after  
583 GVBD  $\pm$  15 min and lysed in Laemmli buffer. SDS-PAGE and immunoblotting were  
584 carried out by standard procedures. Immunoblot membrane sections were incubated  
585 for 16 hours at 4°C with either anti-securin (Abcam, AB3305) or anti-separase  
586 (Abnova, 6H6). Non-fat milk (5%) was used as a blocking solution and anti-mouse  
587 IgG (7076P2; Cell Signaling) and ECL Select (RPN2235; GE Healthcare) were used  
588 as secondary detection reagents. ECL Select detection reagents were specifically used  
589 to produce x-ray signals with broad linear dynamic range. Membranes were exposed  
590 to Hyperfilm x-ray film (Amersham Biosciences) and developed using a SRX101 film  
591 processor (Konica). Exposure time depended on the strength of the signal.  
592 Immunoblots are representative of 2 independent blots.

## 593 **Quantification and Statistical Analysis**

594 Real-time destruction profiles were recorded in MetaFluor (Molecular Devices) and  
595 data was automatically logged in Excel. By taking an average VFP intensity reading  
596 from a defined region of interest around the oocyte, fluorescence intensity was plotted  
597 over time and oocyte data sets were aligned at PB1 extrusion unless otherwise stated.  
598 Average polar body extrusion timings were identical between experimental groups  
599 unless otherwise stated. Fluorescence data values are arbitrary. In order to give the  
600 destruction profile of each oocyte equal weighting, when generating an average  
601 treatment destruction profile, all individual data sets were normalised prior to  
602 calculation (taking the maximum point of fluorescence prior to protein destruction as  
603 100 a.u.). However, like the examples shown in Figures S2 and S3b-d, we also  
604 compared all raw traces, confirming that in each case experiment, the order and

605 pattern of construct destruction remained the same, regardless of data handling  
606 method.

607 Average cleavage profiles for separate biosensor experiments were produced in Fiji  
608 by creating a clipping mask to the DNA using the far red signal emitted by SiR DNA  
609 treatment. The eGFP and mCherry intensity readings from the clipping mask were  
610 then plotted over time and aligned at PB1 extrusion. eGFP/mCherry ratios were  
611 calculated in Excel.

612 When only two constructs are compared, we have displayed both the average trace  
613 and individual traces. Where 3 or more constructs are compared, for clarity, only the  
614 average trace is shown with SEM error bars.

615

## 616 **Acknowledgements**

617 We thank Professor Jonathan MG Higgins for scientific discussion throughout this  
618 study and for critical reading of the manuscript along with Dr. Alexandre Webster.

619 We thank F. Davidson for technical assistance. This work was supported by a  
620 Wellcome Trust Career Re-entry Fellowship grant to SM [062376]. ORD is a Sir  
621 Henry Dale Fellow jointly funded by the Wellcome Trust and Royal Society [Grant  
622 Number 104158/Z/14/Z].

623

## 624 **Author contributions**

625 CT carried out all experiments alongside SM, with critical contribution from BH in  
626 western blotting experiments and MDL in microscopy. The project was carried out  
627 under the supervision of SM and MDL. CT and SM designed the experiments with  
628 assistance from ORD. CT and SM prepared the manuscript with assistance from  
629 ORD. The authors declare no competing financial interests.

630

631

632

## 633 Bibliography

- 634 1. Sansregret, L. & Swanton, C. The role of aneuploidy in cancer evolution. *Cold*  
635 *Spring Harb. Perspect. Med.* **7**, 1–18 (2017).
- 636 2. Gordon, D. J., Resio, B. & Pellman, D. Causes and consequences of  
637 aneuploidy in cancer. *Nat. Rev. Genet.* **13**, 189–203 (2012).
- 638 3. Nagaoka, S. I., Hassold, T. J. & Hunt, P. A. Human aneuploidy: mechanisms  
639 and new insights into an age-old problem. *Nat Rev Genet* **13**, 493–504 (2012).
- 640 4. Herbert, M., Kalleas, D., Cooney, D., Lamb, M. & Lister, L. Meiosis and  
641 Maternal Aging: Insights from Aneuploid Oocytes and Trisomy Births. *Cold*  
642 *Spring Harb Perspect Biol.* **7**, a017970 (2015).
- 643 5. Webster, A. & Schuh, M. Mechanisms of Aneuploidy in Human Eggs. *Trends*  
644 *Cell Biol.* **27**, 55–68 (2017).
- 645 6. Uhlmann, F., Wernic, D., Poupart, M.-A., Koonin, E. V & Nasmyth, K.  
646 Cleavage of Cohesin by the CD Clan Protease Separin Triggers Anaphase in  
647 Yeast. *Cell* **103**, 375–386 (2000).
- 648 7. Hauf, S., Waizenegger, I. C. & Peters, J. M. Cohesin cleavage by separase  
649 required for anaphase and cytokinesis in human cells. *Science (80-. ).* **293**,  
650 1320–1323 (2001).
- 651 8. Waizenegger, I. C., Giménez-Abián, J. F., Wernic, D. & Peters, J. M.  
652 Regulation of human separase by securin binding and autocleavage. *Curr. Biol.*  
653 **12**, 1368–1378 (2002).
- 654 9. Stemmann, O., Zou, H., Gerber, S. A., Gygi, S. P. & Kirschner, M. W. Dual  
655 inhibition of sister chromatid separation at metaphase. *Cell* **107**, 715–726  
656 (2001).
- 657 10. Gorr, I. H., Boos, D. & Stemmann, O. Mutual inhibition of separase and Cdk1  
658 by two-step complex formation. *Mol. Cell* **19**, 135–141 (2005).
- 659 11. Stemmann, O., Gorr, I. H. & Boos, D. Anaphase topsy-turvy: Cdk1 a securin,  
660 separase a CKI. *Cell Cycle* **5**, 11–13 (2006).

- 661 12. Holland, A. J. & Taylor, S. S. Cyclin-B1-mediated inhibition of excess  
662 separase is required for timely chromosome disjunction. *J. Cell Sci.* **119**, 3325–  
663 3336 (2006).
- 664 13. Nabti, I., Reis, A., Levasseur, M., Stemmann, O. & Jones, K. T. Securin and  
665 not CDK1/cyclin B1 regulates sister chromatid disjunction during meiosis II in  
666 mouse eggs. *Dev. Biol.* **321**, 379–386 (2008).
- 667 14. Huang, X. *et al.* Preimplantation Mouse Embryos Depend on Inhibitory  
668 Phosphorylation of Separase To Prevent Chromosome Missegregation. *Mol.*  
669 *Cell. Biol.* **29**, 1498–1505 (2009).
- 670 15. Kamenz, J. & Hauf, S. Time To Split Up: Dynamics of Chromosome  
671 Separation. *Trends Cell Biol.* **27**, 42–54 (2017).
- 672 16. Mei, J., Huang, X. & Zhang, P. Securin is not required for cellular viability, but  
673 is required for normal growth of mouse embryonic fibroblasts. *Curr. Biol.* **11**,  
674 1197–1201 (2001).
- 675 17. Pflieger, K., Heubes, S., Cox, J., Stemmann, O. & Speicher, M. R. Securin is  
676 not required for chromosomal stability in human cells. *PLoS Biol.* **3**, 1–8  
677 (2005).
- 678 18. Wirth, K. G. *et al.* Separase: A universal trigger for sister chromatid  
679 disjunction but not chromosome cycle progression. *J. Cell Biol.* **172**, 847–860  
680 (2006).
- 681 19. Chiang, T., Schultz, R. M. & Lampson, M. a. Age-Dependent Susceptibility of  
682 Chromosome Cohesion to Premature Separase Activation in Mouse Oocytes.  
683 *Biol. Reprod.* **85**, 1279–1283 (2011).
- 684 20. Hornig, N. C. D., Knowles, P. P., McDonald, N. Q. & Uhlmann, F. The dual  
685 mechanism of separase regulation by securin. *Current Biology* **12**, 973–982  
686 (2002).
- 687 21. Holland, A. J. & Taylor, S. S. Many faces of separase regulation. *SEB Exp.*  
688 *Biol. Ser.* **59**, 99–112 (2008).
- 689 22. Hellmuth, S. *et al.* Positive and negative regulation of vertebrate separase by



- 690 Cdk1-cyclin B1 may explain why securin is dispensable. *J. Biol. Chem.* **290**,  
691 8002–8010 (2015).
- 692 23. Herbert, M. *et al.* Homologue disjunction in mouse oocytes requires proteolysis  
693 of securin and cyclin B1. *Nat. Cell Biol.* **5**, 1023–1025 (2003).
- 694 24. Kamenz, J., Mihaljev, T., Kubis, A., Legewie, S. & Hauf, S. Robust Ordering  
695 of Anaphase Events by Adaptive Thresholds and Competing Degradation  
696 Pathways. *Mol. Cell* **60**, 446–459 (2015).
- 697 25. Rattani, A. *et al.* Dependency of the spindle assembly checkpoint on Cdk1  
698 renders the anaphase transition irreversible. *Curr. Biol.* **24**, 630–637 (2014).
- 699 26. Yamano, H. *et al.* The role of the destruction box and its neighbouring lysine  
700 residues in cyclin B for anaphase ubiquitin- dependent proteolysis in ssion  
701 yeast: de ning the D-box receptor. **17**, 5670–5678 (1998).
- 702 27. Hagting, A. *et al.* Human securin proteolysis is controlled by the spindle  
703 checkpoint and reveals when the APC/C switches from activation by Cdc20 to  
704 Cdh1. *J. Cell Biol.* **157**, 1125–1137 (2002).
- 705 28. Glotzer, M., Murray, A. W. & Kirschner, M. W. Cyclin is degraded by the  
706 ubiquitin pathway. *Nature* **349**, 132–138 (1991).
- 707 29. Pflieger, C. M., Lee, E. & Kirschner, M. W. Substrate recognition by the Cdc20  
708 and Cdh1 components of the anaphase-promoting complex. *Genes Dev.* **15**,  
709 2396–2407 (2001).
- 710 30. Zur, A. & Brandeis, M. Securin degradation is mediated by fzy and fzr, and is  
711 required for complete chromatid separation but not for cytokinesis. *EMBO J.*  
712 **20**, 792–801 (2001).
- 713 31. Chao, W. C. H., Kulkarni, K., Zhang, Z., Kong, E. H. & Barford, D. Structure  
714 of the mitotic checkpoint complex. *Nature* **484**, 208–213 (2012).
- 715 32. He, J. *et al.* Insights into degron recognition by APC/C coactivators from the  
716 structure of an Acm1-Cdh1 complex. *Mol. Cell* **50**, 649–660 (2013).
- 717 33. Foley, E. A. & Kapoor, T. M. Microtubule attachment and spindle assembly  
718 checkpoint signalling at the kinetochore. *Nat. Rev. Mol. Cell Biol.* **14**, 25–37

- 719 (2012).
- 720 34. Lara-Gonzalez, P., Westhorpe, F. G. & Taylor, S. S. The spindle assembly  
721 checkpoint. *Curr. Biol.* **22**, R966–R980 (2012).
- 722 35. Homer, H. A., McDougall, A., Levasseur, M., Murdoch, A. P. & Herbert, M.  
723 Mad2 is required for inhibiting securin and cyclin B degradation following  
724 spindle depolymerisation in meiosis I mouse oocytes. *Reproduction* **130**, 829–  
725 843 (2005).
- 726 36. Levasseur, M. D., Thomas, C., Davies, O. R., Higgins, J. M. G. & Madgwick,  
727 S. Aneuploidy in Oocytes Is Prevented by Sustained CDK1 Activity through  
728 Degron Masking in Cyclin B1. *Dev. Cell* **48**, 672–684.e5 (2019).
- 729 37. Nam, H.-J. & van Deursen, J. M. Cyclin B2 and p53 control proper timing of  
730 centrosome separation. *Nat. Cell Biol.* **16**, 538–549 (2014).
- 731 38. Nikalayevich, E., Bouftas, N. & Wassmann, K. Detection of Separase Activity  
732 Using a Cleavage Sensor in Live Mouse Oocytes. in *Mouse Oocyte*  
733 *Development: Methods and Protocols* (eds. Verlhac, M.-H. & Terret, M.-E.)  
734 99–112 (Springer New York, 2018). doi:10.1007/978-1-4939-8603-3\_11
- 735 39. Karasu, M. E., Bouftas, N., Keeney, S. & Wassmann, K. Cyclin B3 promotes  
736 anaphase i onset in oocyte meiosis. *J. Cell Biol.* **218**, 1265–1281 (2019).
- 737 40. Lane, S. I. R., Yun, Y. & Jones, K. T. Timing of anaphase-promoting complex  
738 activation in mouse oocytes is predicted by microtubule-kinetochore  
739 attachment but not by bivalent alignment or tension. *Development* **139**, 1947–  
740 55 (2012).
- 741 41. Luo, S. & Tong, L. Molecular mechanism for the regulation of yeast separase  
742 by securin. *Nature* **542**, 255–259 (2017).
- 743 42. Luo, S. & Tong, L. Structural biology of the separase–securin complex with  
744 crucial roles in chromosome segregation. *Curr. Opin. Struct. Biol.* **49**, 114–122  
745 (2018).
- 746 43. Hellmuth, S., Böttger, F., Pan, C., Mann, M. & Stemmann, O. PP2A delays  
747 APC/C-dependent degradation of separase-associated but not free securin.

- 748 *EMBO J.* **33**, 1134–1147 (2014).
- 749 44. Heinrich, S. *et al.* Determinants of robustness in spindle assembly checkpoint  
750 signalling. *Nat. Cell Biol.* **15**, 1328–1339 (2013).
- 751 45. Lukinavičius, G. *et al.* SiR–Hoechst is a far-red DNA stain for live-cell  
752 nanoscopy. *Nat. Commun.* **6**, 8497 (2015).
- 753 46. Wei, Z., Greaney, J., Zhou, C. & A. Homer, H. Cdk1 inactivation induces post-  
754 anaphase-onset spindle migration and membrane protrusion required for  
755 extreme asymmetry in mouse oocytes. *Nat. Commun.* **9**, (2018).
- 756 47. Hayes, M. J. *et al.* Early mitotic degradation of Nek2A depends on Cdc20-  
757 independent interaction with the APC/C. *Nat. Cell Biol.* **8**, 607–614 (2006).
- 758 48. Zon, W. van & Wolthuis, R. M. F. Cyclin A and Nek2A: APC/C–Cdc20  
759 substrates invisible to the mitotic spindle checkpoint. *Biochem. Soc. Trans.* **38**,  
760 72–77 (2010).
- 761 49. Di Fiore, B. & Pines, J. How cyclin a destruction escapes the spindle assembly  
762 checkpoint. *J. Cell Biol.* **190**, 501–509 (2010).
- 763 50. DiFiore, B. *et al.* The ABBA Motif binds APC/C activators and is shared by  
764 APC/C substrates and regulators. *Dev. Cell* **32**, 358–372 (2015).
- 765 51. Li, Y. *et al.* Cyclin b3 is required for metaphase to anaphase transition in  
766 oocyte meiosis I. *J. Cell Biol.* **218**, 1553–1563 (2019).
- 767 52. Bouftas, N. & Wassmann, K. Cycling through mammalian meiosis: B-type  
768 cyclins in oocytes. *Cell Cycle* **18**, 1537–1548 (2019).
- 769 53. Tachibana-Konwalski, K. *et al.* Rec8-containing cohesin maintains bivalents  
770 without turnover during the growing phase of mouse oocytes. *Genes Dev.* **24**,  
771 2505–2516 (2010).
- 772 54. Lister, L. M. *et al.* Age-related meiotic segregation errors in mammalian  
773 oocytes are preceded by depletion of cohesin and Sgo2. *Curr. Biol.* **20**, 1511–  
774 1521 (2010).
- 775 55. Schuh, M. & Ellenberg, J. Self-Organization of MTOCs Replaces Centrosome

- 776           Function during Acentrosomal Spindle Assembly in Live Mouse Oocytes. *Cell*  
777           **130**, 484–498 (2007).
- 778   56.   Holubcova, Z., Blayney, M., Elder, K. & Schuh, M. Error-prone chromosome-  
779           mediated spindle assembly favors chromosome segregation defects in human  
780           oocytes. *Science* (80-. ). **348**, 1143–1147 (2015).
- 781   57.   Nabti, I., Grimes, R., Sarna, H., Marangos, P. & Carroll, J. Maternal age-  
782           dependent APC/C-mediated decrease in securin causes premature sister  
783           chromatid separation in meiosis II. *Nat. Commun.* **8**, 15346 (2017).
- 784   58.   Kyogoku, H. & Kitajima, T. S. Large Cytoplasm Is Linked to the Error-Prone  
785           Nature of Oocytes. *Dev. Cell* **41**, 287–298.e4 (2017).
- 786   59.   Prodon, F. *et al.* Dual mechanism controls asymmetric spindle position in  
787           ascidian germ cell precursors. *Development* **137**, 2011–2021 (2010).
- 788   60.   Madgwick, S. *et al.* Maintenance of sister chromatid attachment in mouse eggs  
789           through maturation-promoting factor activity. *Dev. Biol.* **275**, 68–81 (2004).
- 790   61.   Jeong, J. Y. *et al.* One-step sequence-and ligation-independent cloning as a  
791           rapid and versatile cloning method for functional genomics Studies. *Appl.*  
792           *Environ. Microbiol.* **78**, 5440–5443 (2012).
- 793   62.   Levasseur, M. Making cRNA for Microinjection and Expression of  
794           Fluorescently Tagged Proteins for Live-Cell Imaging in Oocytes. in  
795           *Mammalian Oocyte Regulation: Methods and Protocols* (ed. Homer, H. A.)  
796           121–134 (Humana Press, 2013). doi:10.1007/978-1-62703-191-2\_8

797

**Figure 1**

**A.**

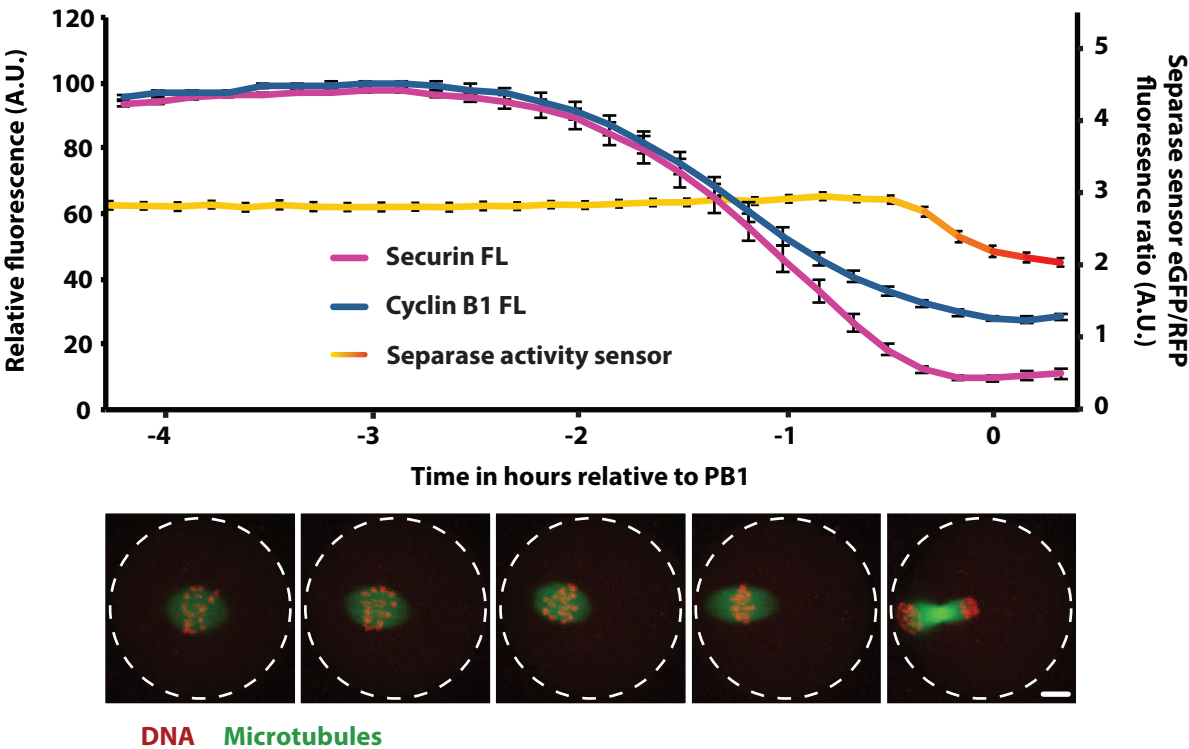

**B.**

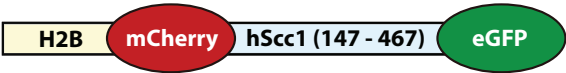

**C.**

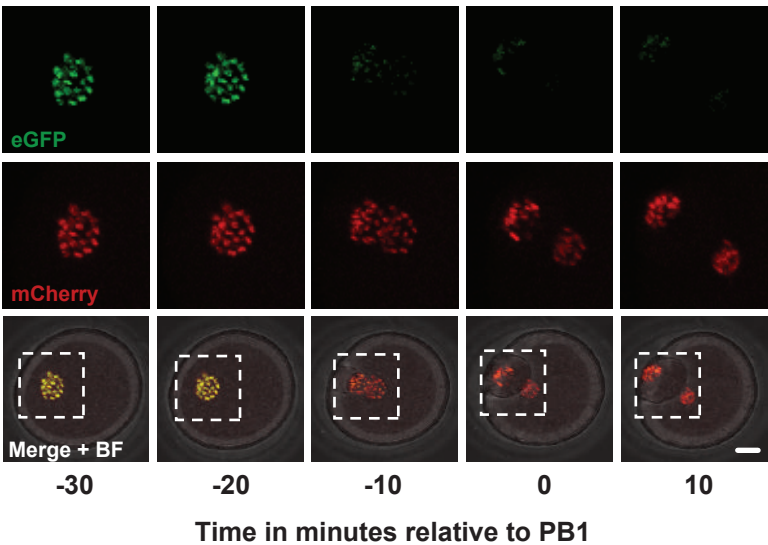

## Figure 2

bioRxiv preprint doi: <https://doi.org/10.1101/824763>; this version posted October 30, 2019. The copyright holder for this preprint (which was not certified by peer review) is the author/funder, who has granted bioRxiv a license to display the preprint in perpetuity. It is made available under aCC-BY-ND 4.0 International license.

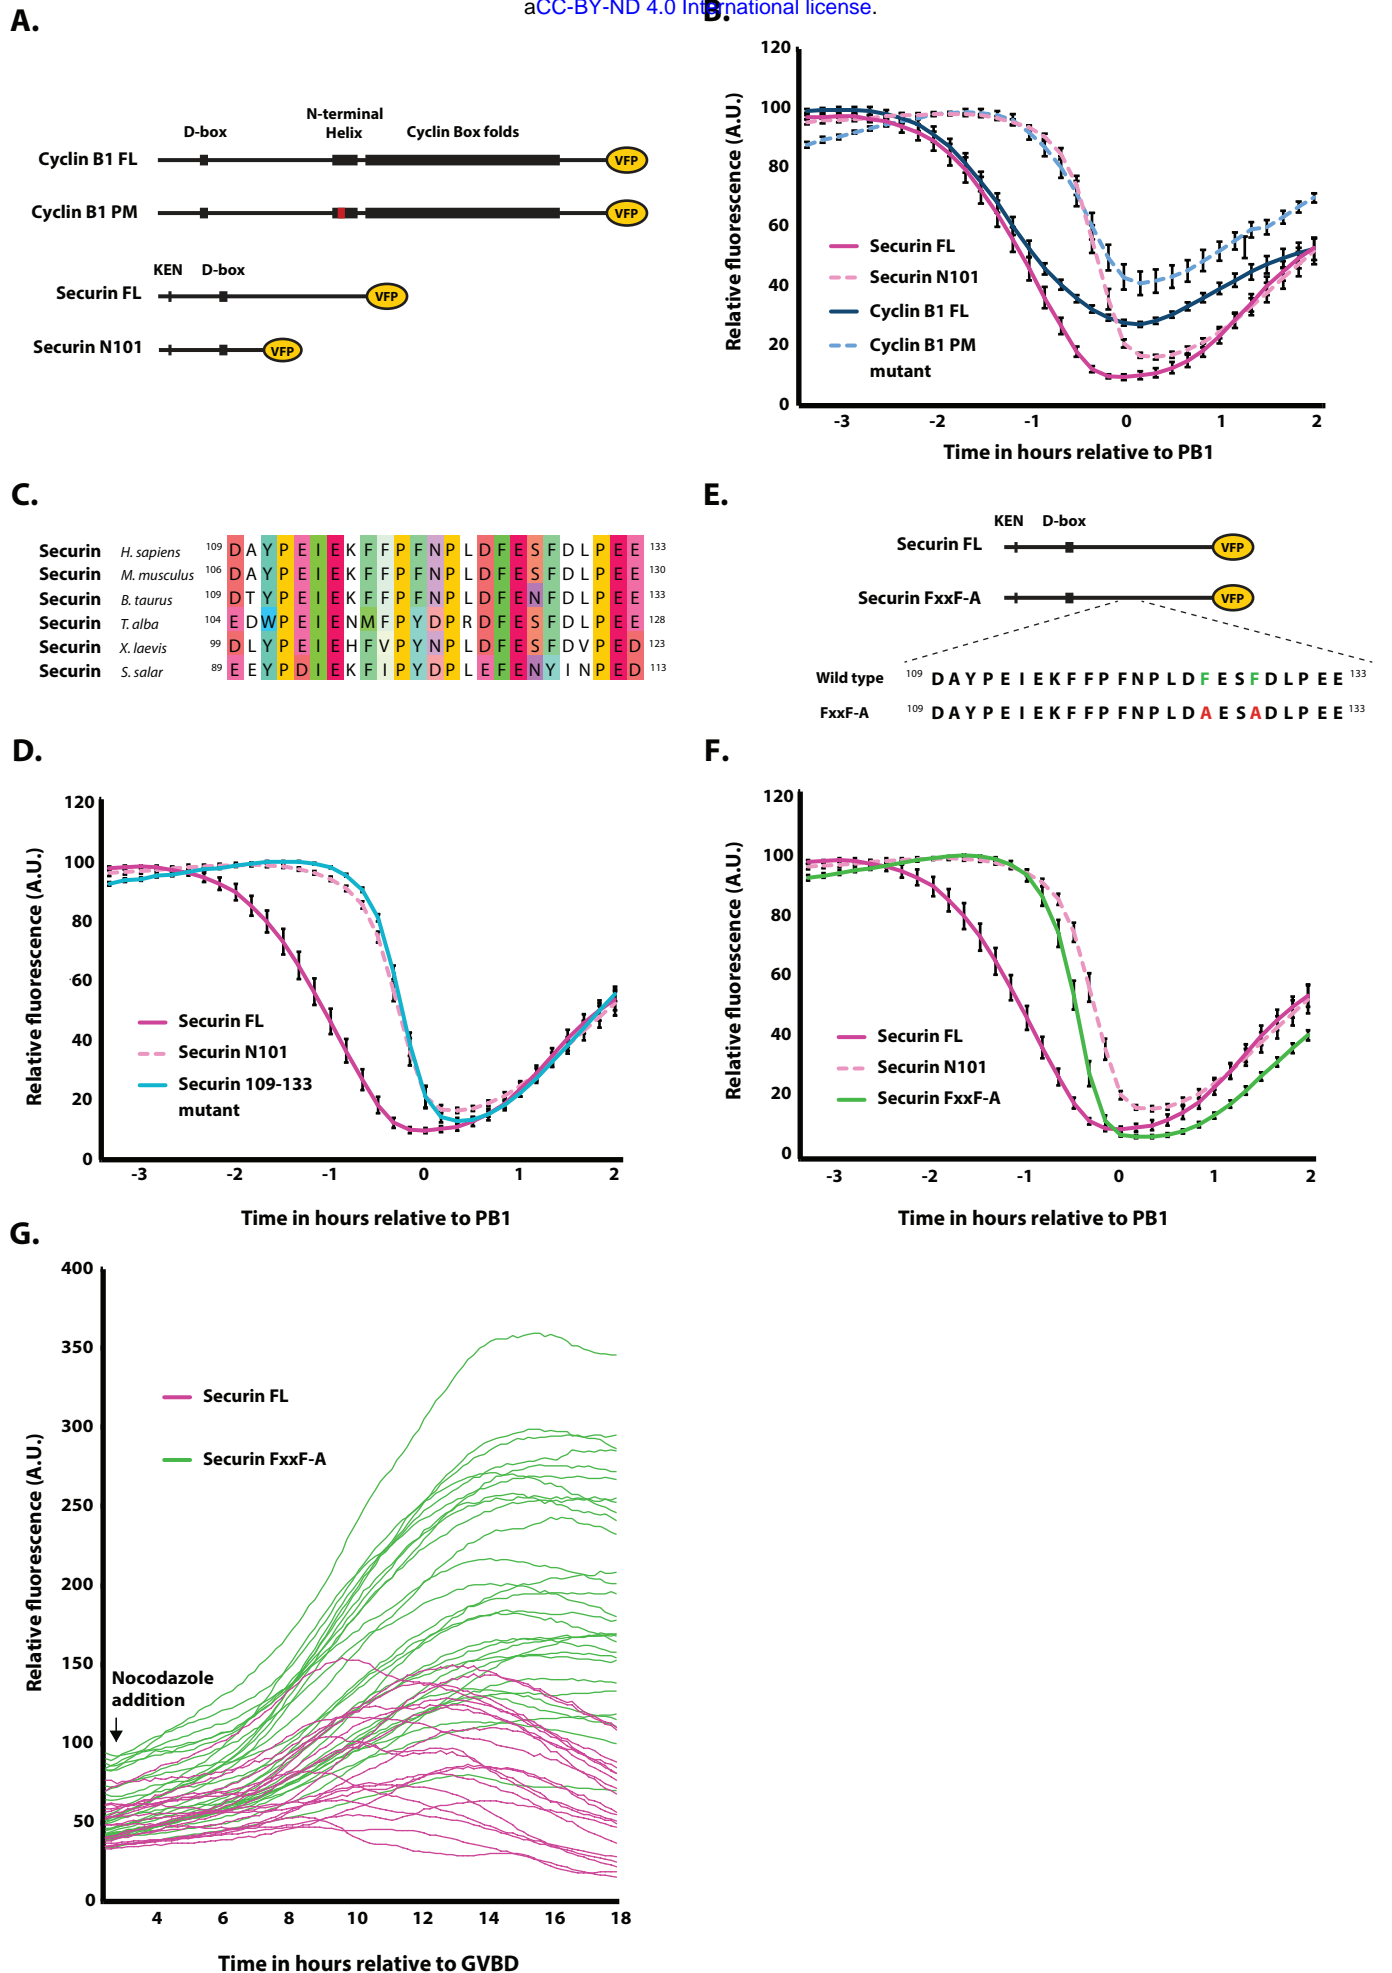

**A.**

|                           |     |   |   |   |   |   |   |   |   |   |   |   |   |   |   |   |   |   |   |   |     |
|---------------------------|-----|---|---|---|---|---|---|---|---|---|---|---|---|---|---|---|---|---|---|---|-----|
| <b>Securin (human)</b>    | 117 | F | F | P | F | N | P | L | D | F | E | S | F | D | L | P | E | E | H | Q | 135 |
| <b>Securin (mouse)</b>    | 114 | F | F | P | F | N | P | L | D | F | E | S | F | D | L | P | E | E | H | Q | 132 |
| <b>Securin (barn owl)</b> | 111 | M | F | P | Y | D | P | R | D | F | E | S | F | D | L | P | E | E | H | K | 129 |
| <b>Securin (frog)</b>     | 107 | F | V | P | Y | N | P | L | D | F | E | S | F | D | V | P | E | D | H | K | 125 |
| <b>Securin (yeast)</b>    | 268 | P | L | P | Y | V | P | E | G | Y | S | P | F | Q | Q | D | D | I | E | K | 286 |
|                           |     |   |   |   |   |   |   |   |   | * |   | * |   |   |   |   |   |   |   |   |     |

**B.**

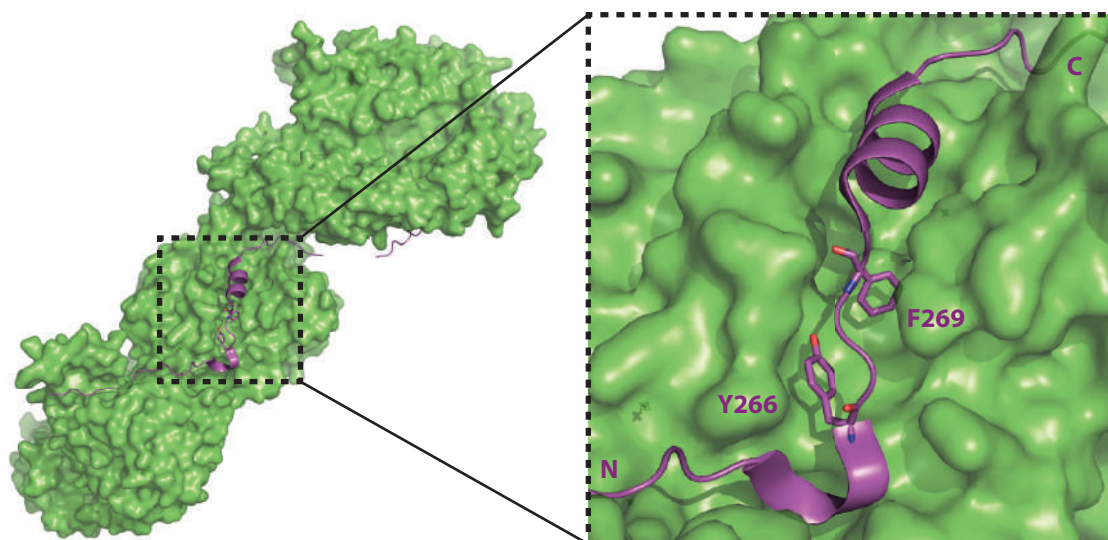

**C.**

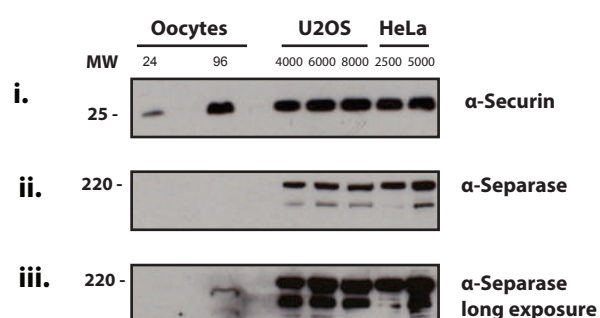



## Figure 4

bioRxiv preprint doi: <https://doi.org/10.1101/824763>; this version posted October 30, 2019. The copyright holder for this preprint (which was not certified by peer review) is the author/funder, who has granted bioRxiv a license to display the preprint in perpetuity. It is made available under aCC-BY-ND 4.0 International license.

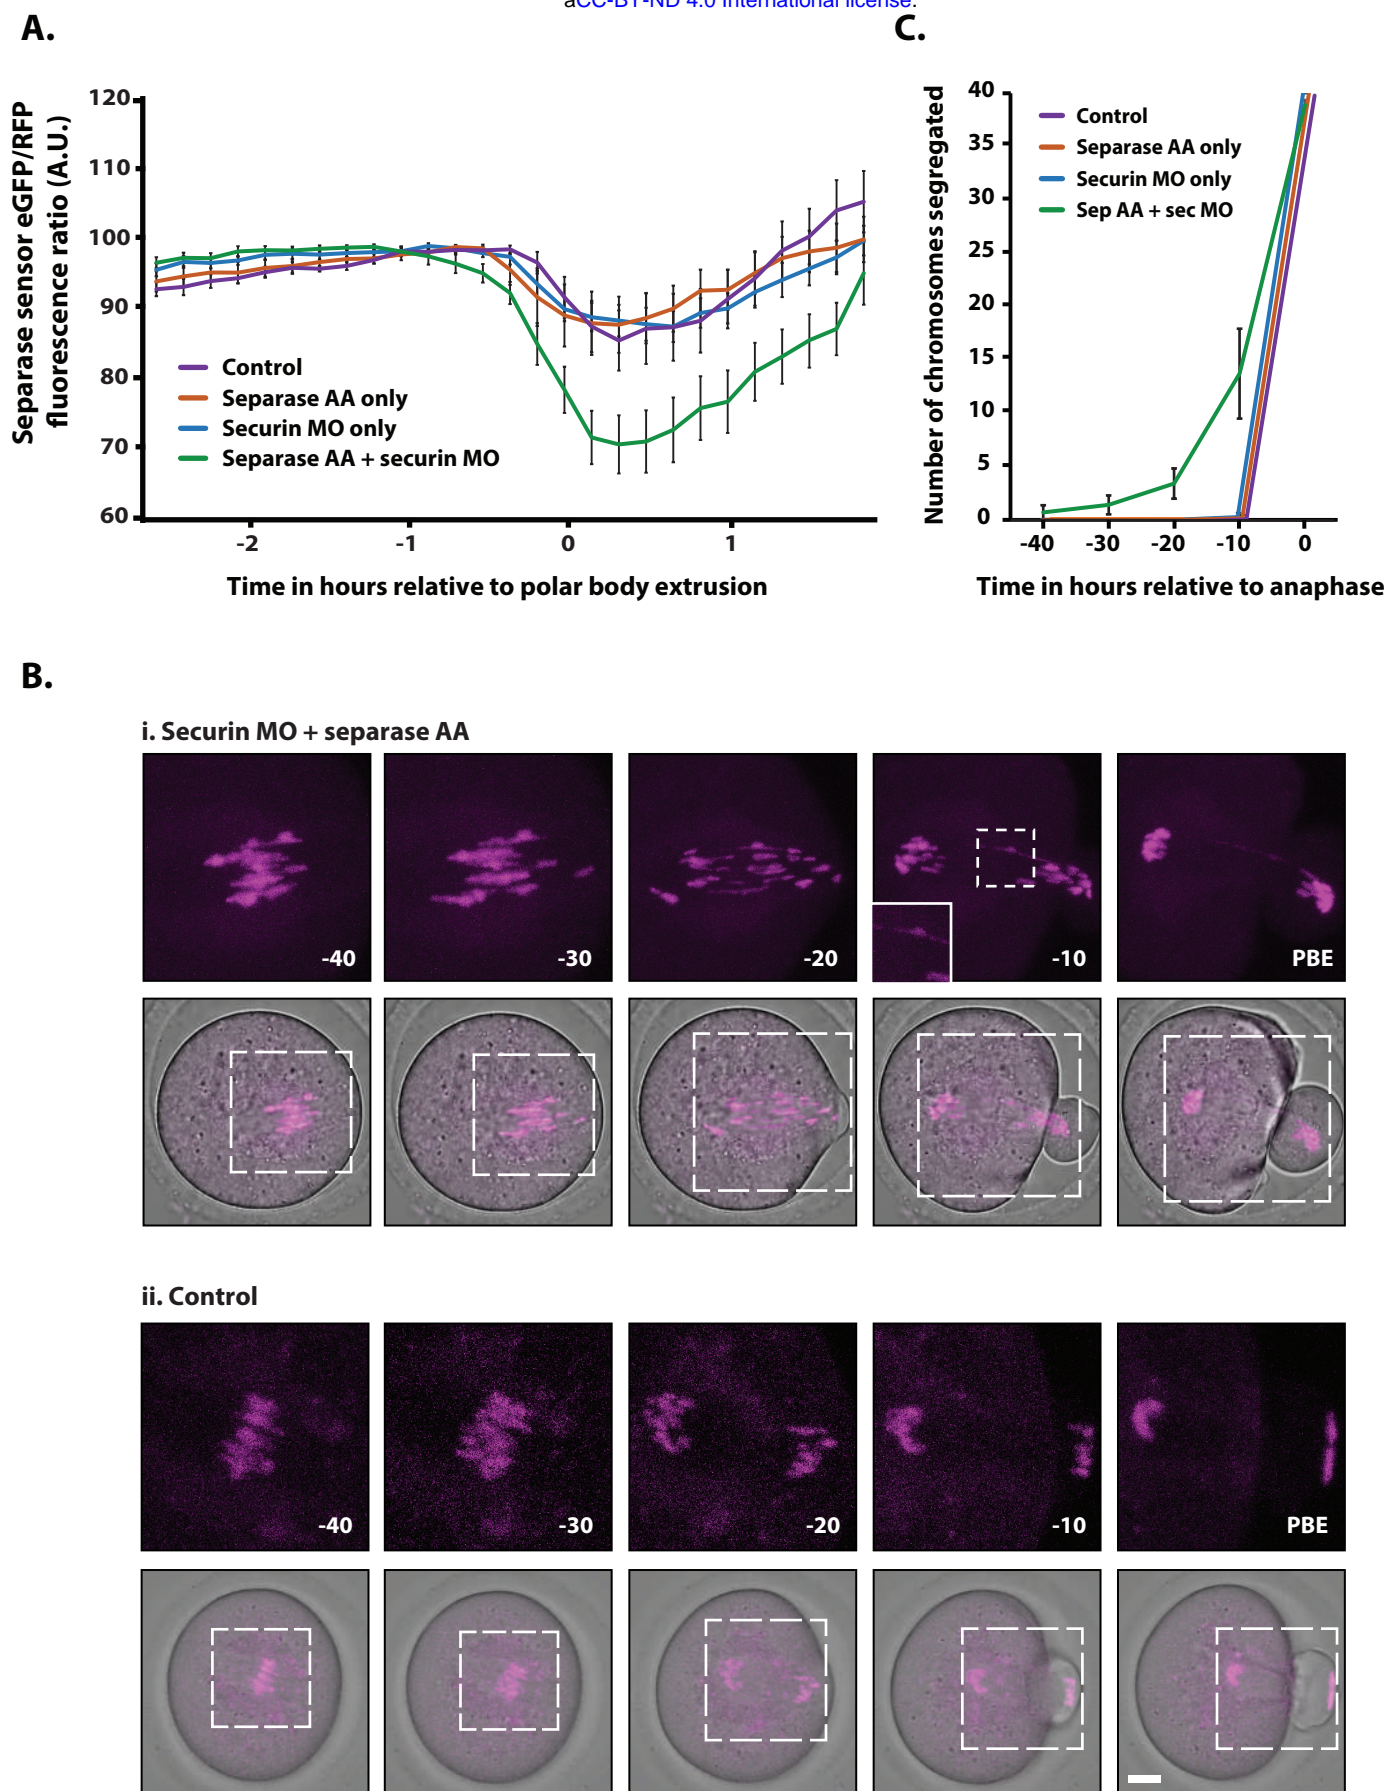

Supplementary Figure 1

A.

|                   |     |                                                   |     |
|-------------------|-----|---------------------------------------------------|-----|
| Securin FL        | 109 | D A Y P E I E K F F P F N P L D F E S F D L P E E | 133 |
| Securin DAYPEIE-A | 109 | A A A A A A A K F F P F N P L D F E S F D L P E E | 133 |
| Securin FFPFNP-A  | 109 | D A Y P E I E K A A A A A A L D F E S F D L P E E | 133 |
| Securin DFESFD-A  | 109 | D A Y P E I E K F F P F N P L A A A A A A L P E E | 133 |
| Securin FxxF-A    | 109 | D A Y P E I E K F F P F N P L D A E S A D L P E E | 133 |

B.

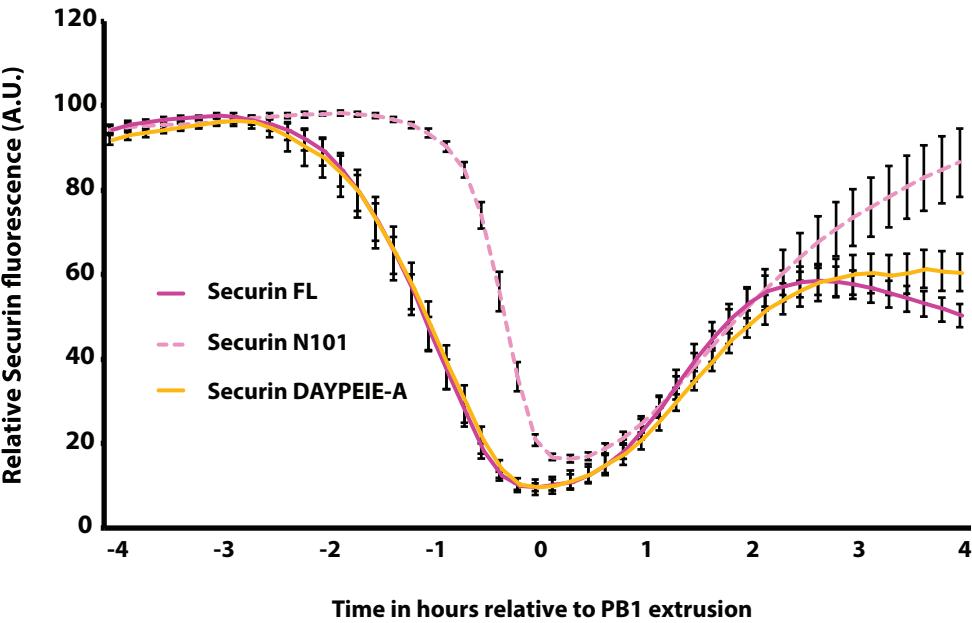

C.

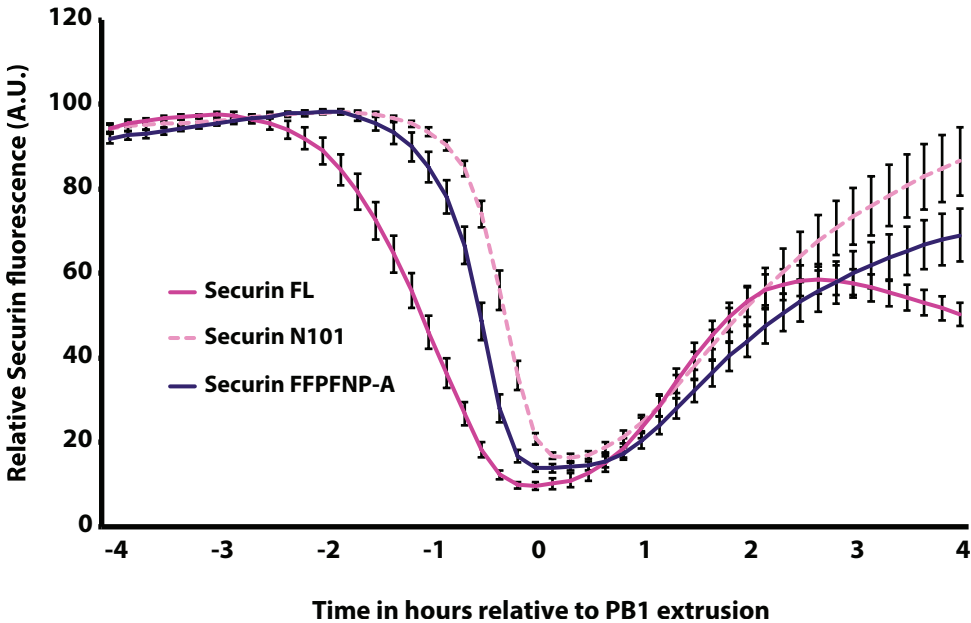

Supplementary Figure 1

D.

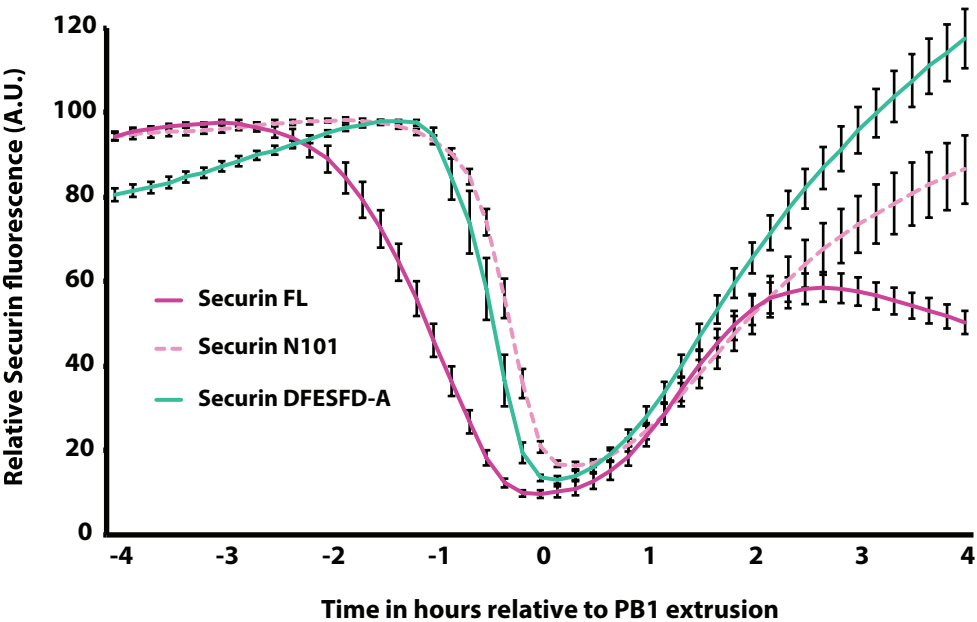

E.

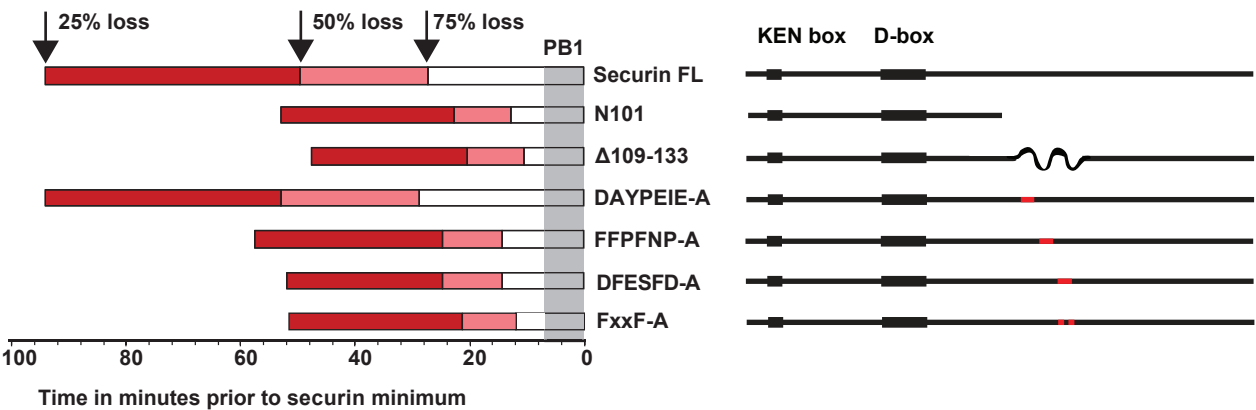

F.

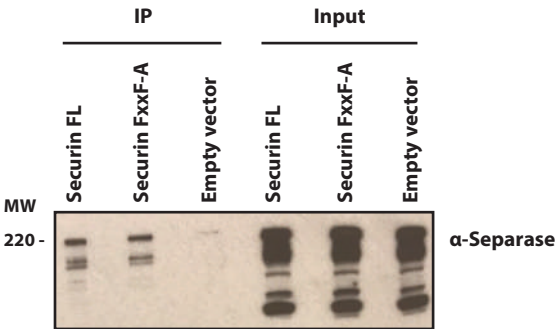

## Supplementary figure 2

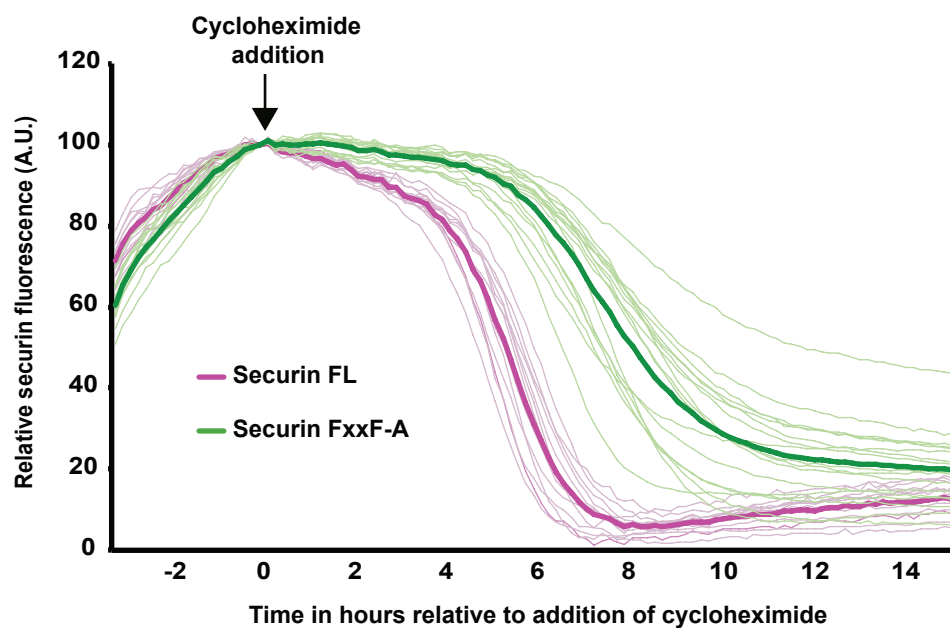

Supplementary figure 3

A.

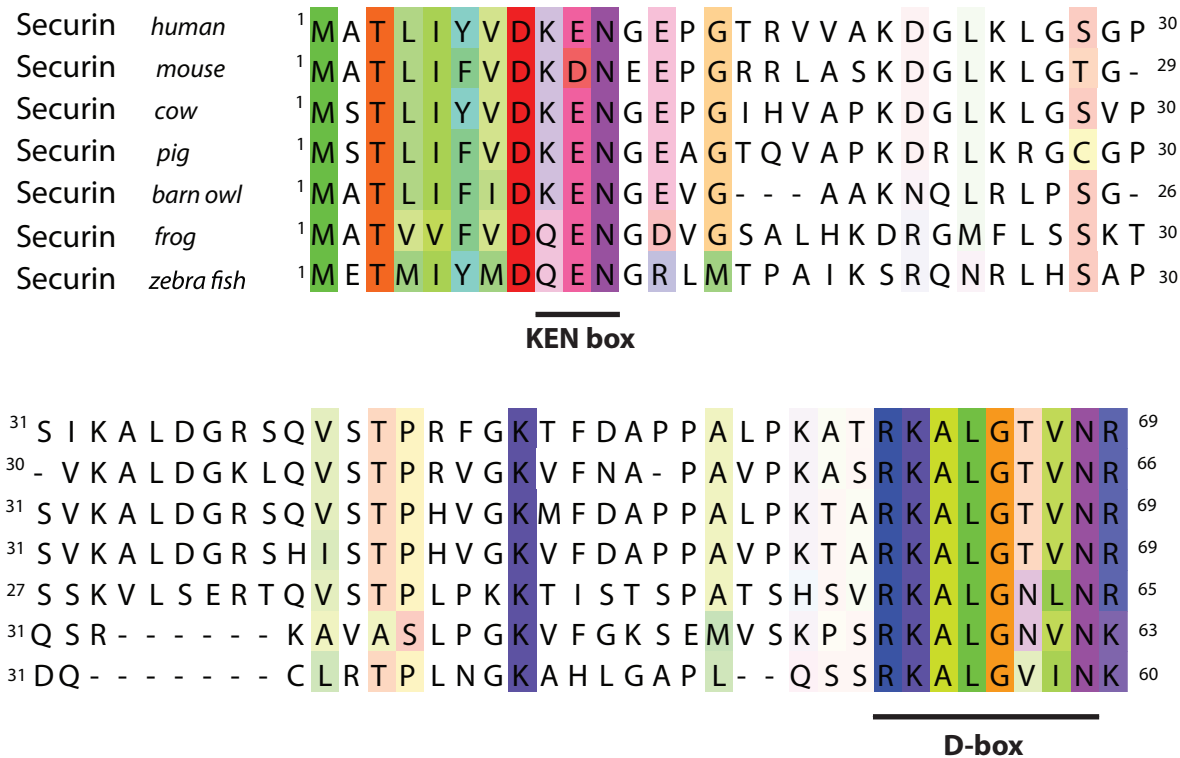

B.

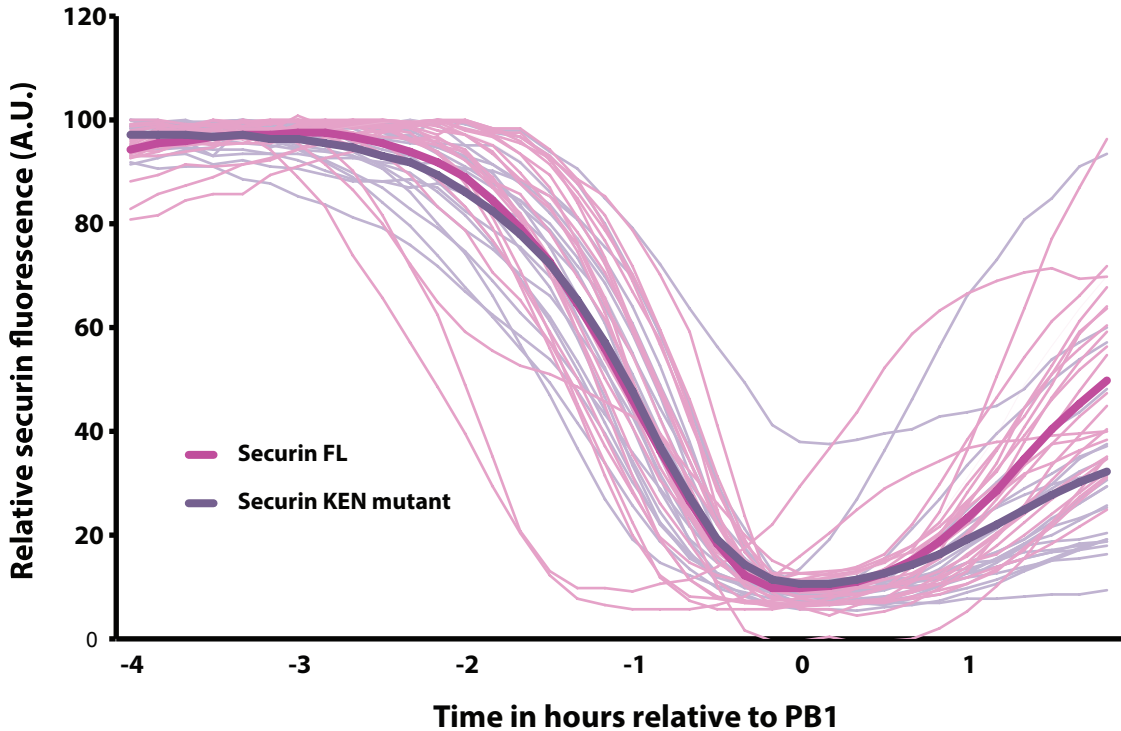

# Supplementary figure 3

C.

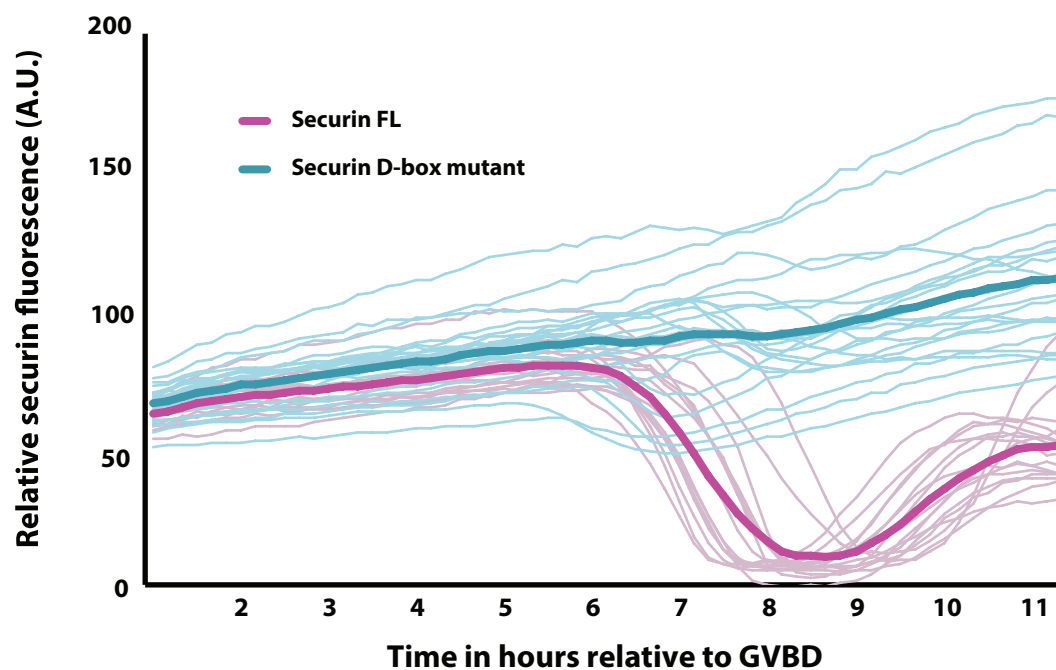

D.

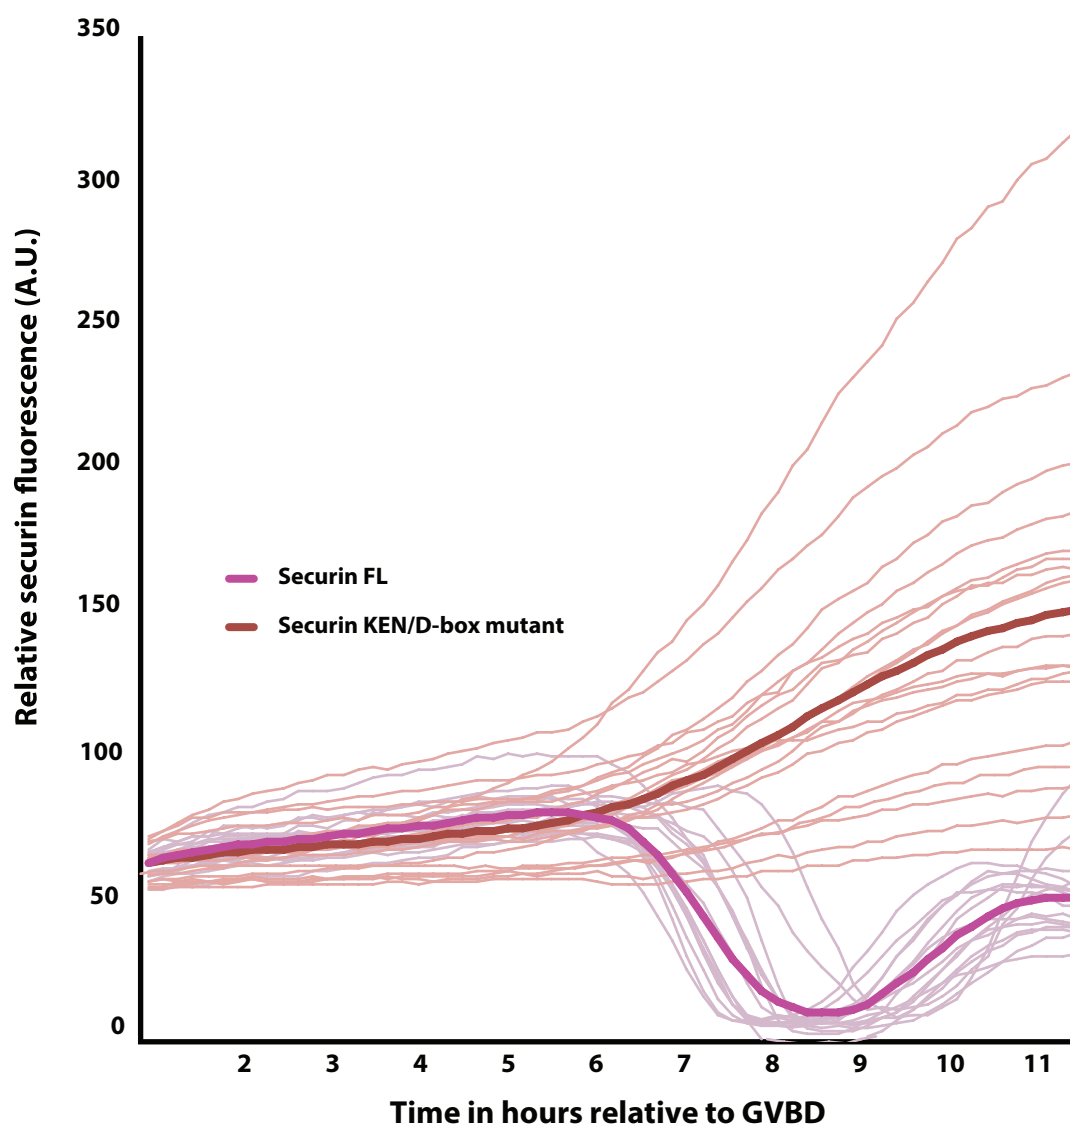

## Supplementary figure 4

A.

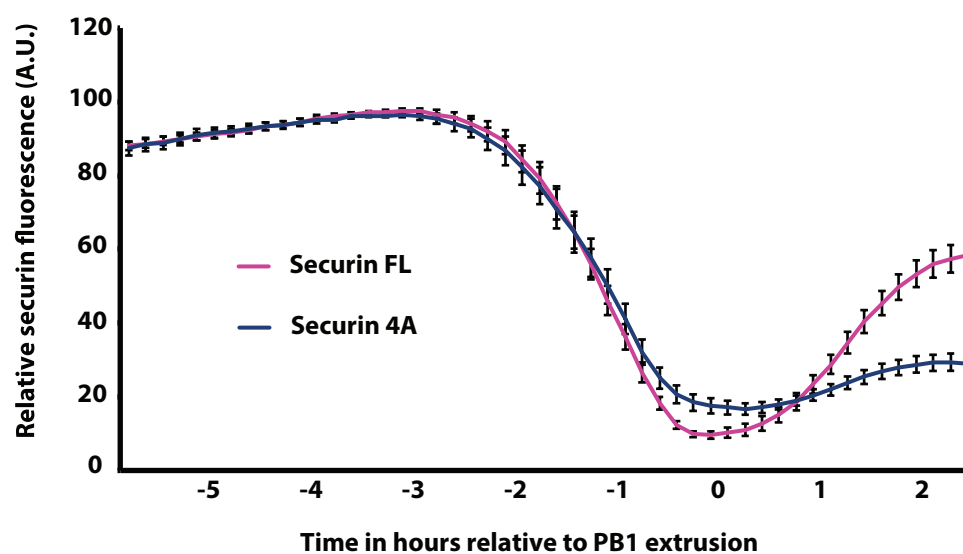



## Supplementary figure 5

**A.**

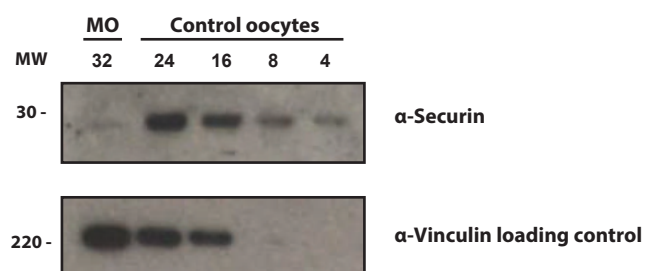

Source: https://www.biorxiv.org/content/10.1101/824763v1.full.pdf
